# Supplementary material
Source: MDPI journal article supplement (https://www.mdpi.com/2311-7524/8/5/405)

# P25 x P35 Full Linkage Map - 1

1 [1]

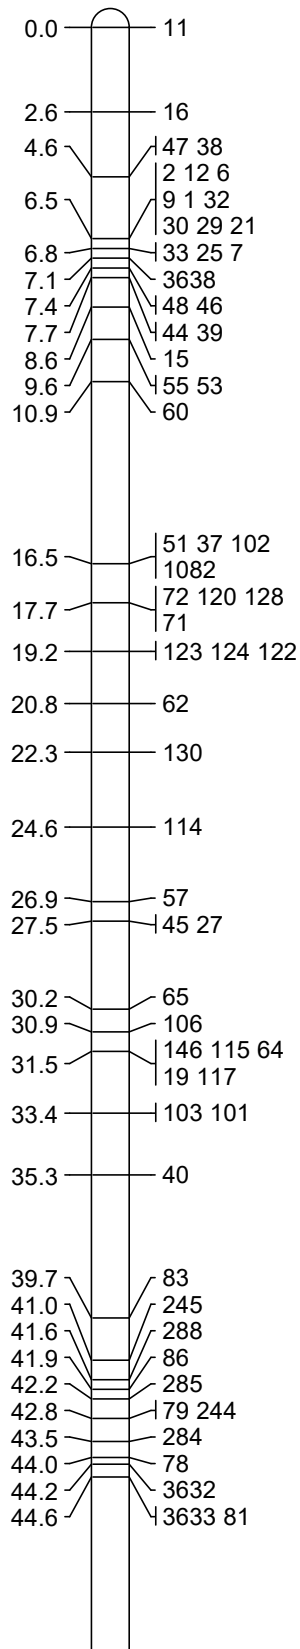

1 [2]

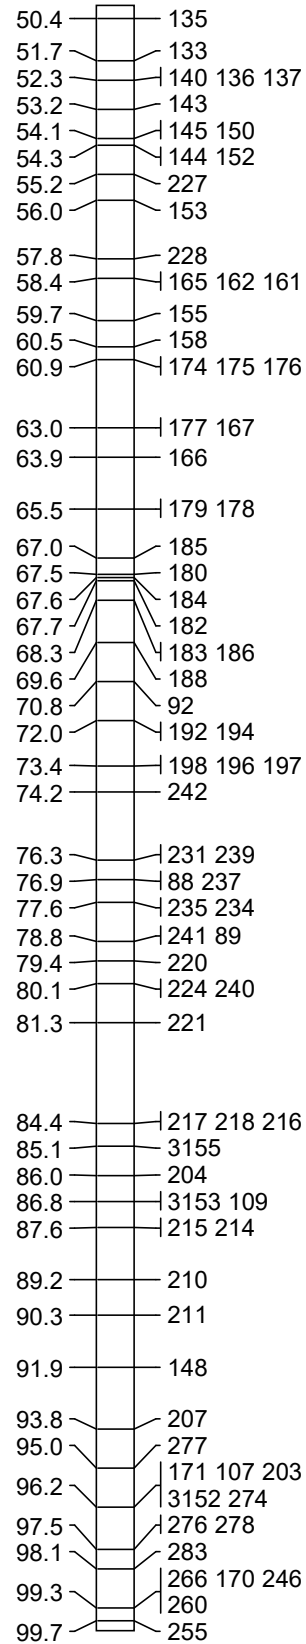

1 [3]

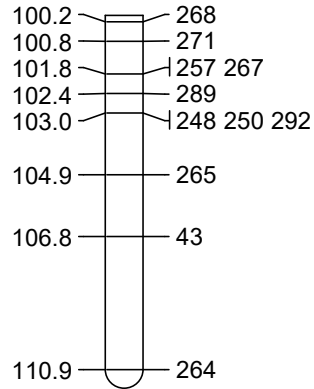

## P25 x P35 Full Linkage Map - 2

**2 [1]**

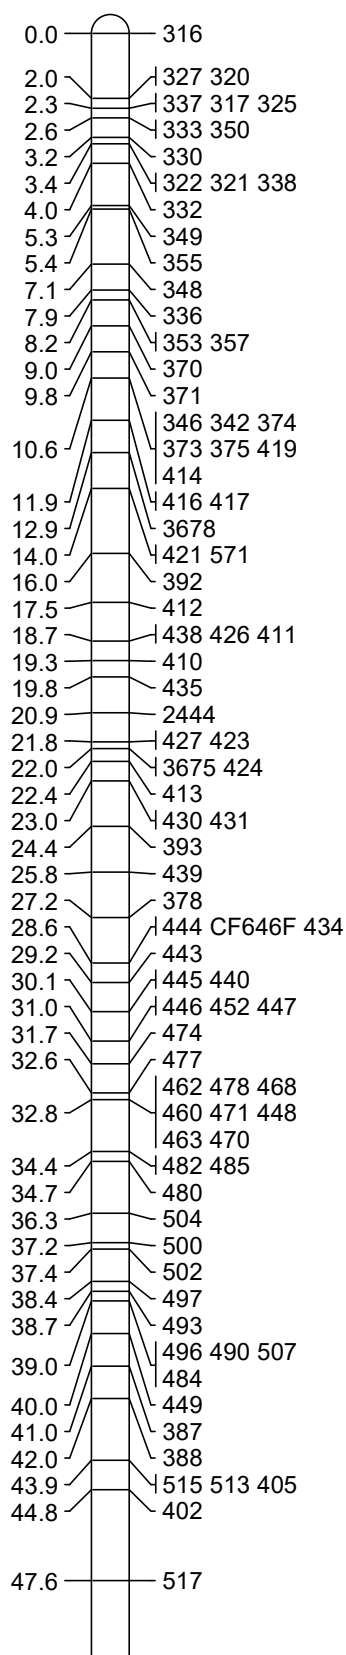

**2 [2]**

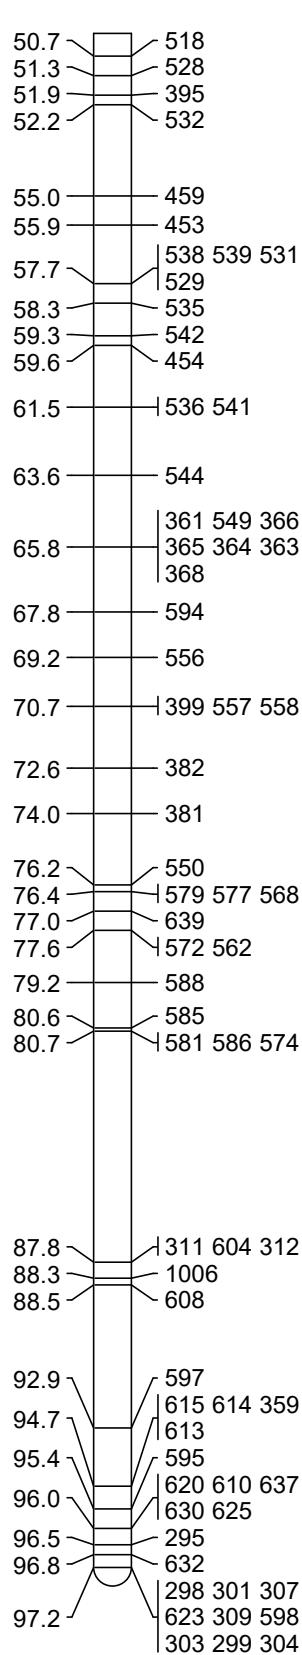

**3 [1]**

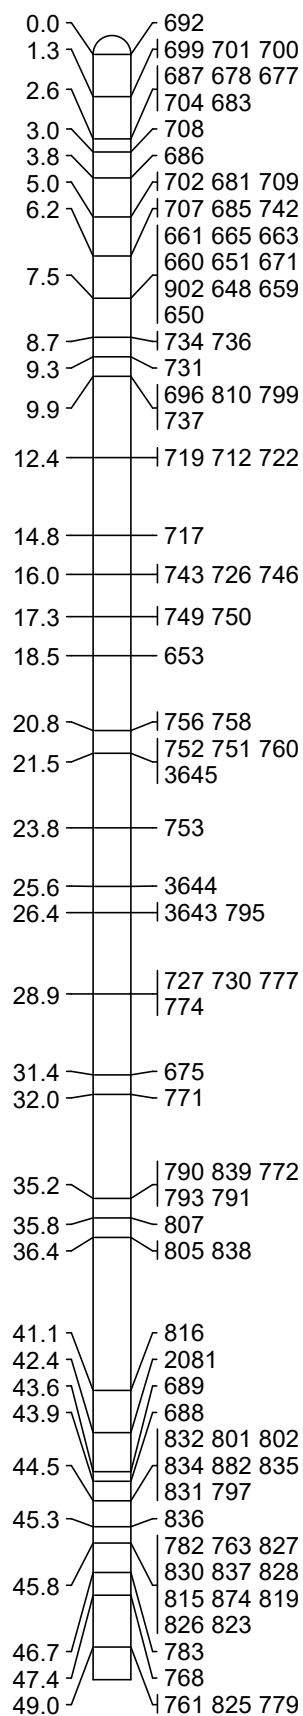

# P25 x P35 Full Linkage Map - 3

3 [2]

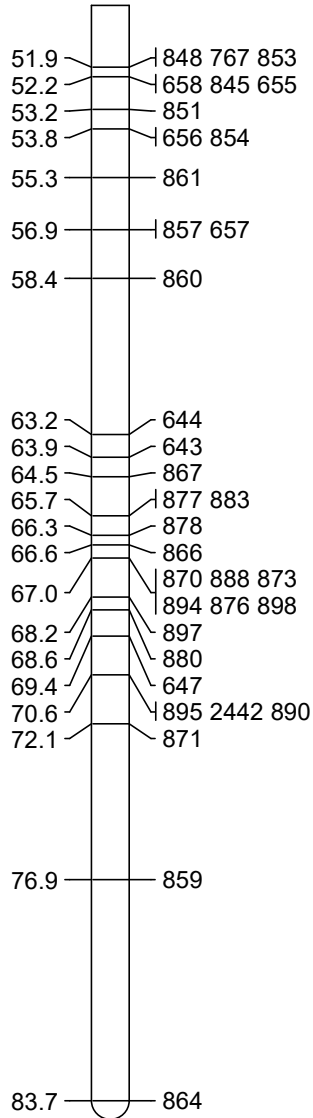

4 [1]

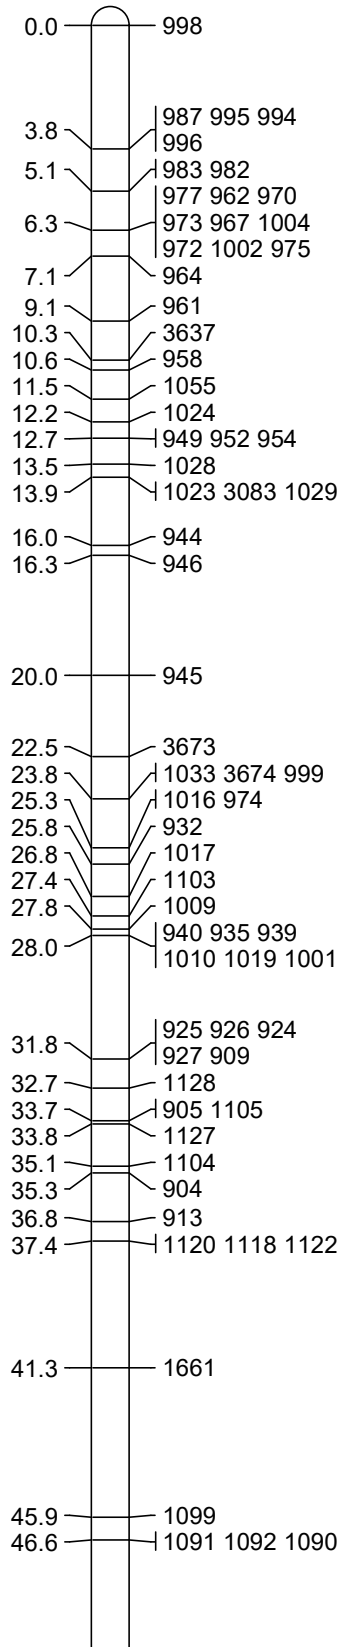

4 [2]

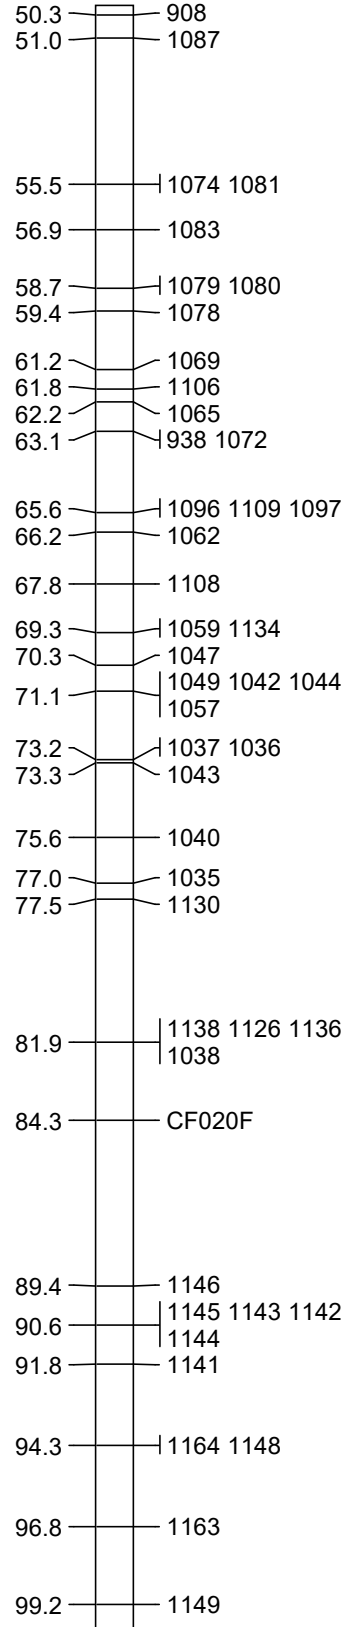

# P25 x P35 Full Linkage Map - 4

4 [3]

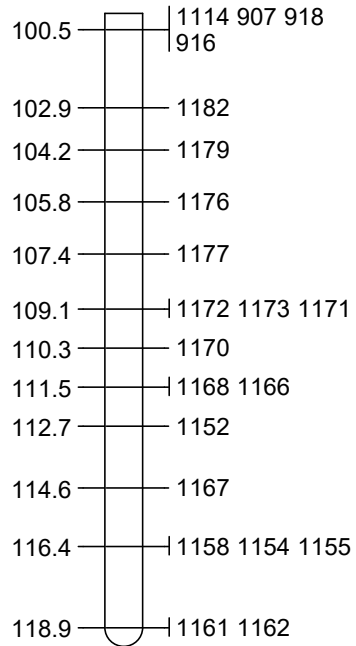

5 [1]

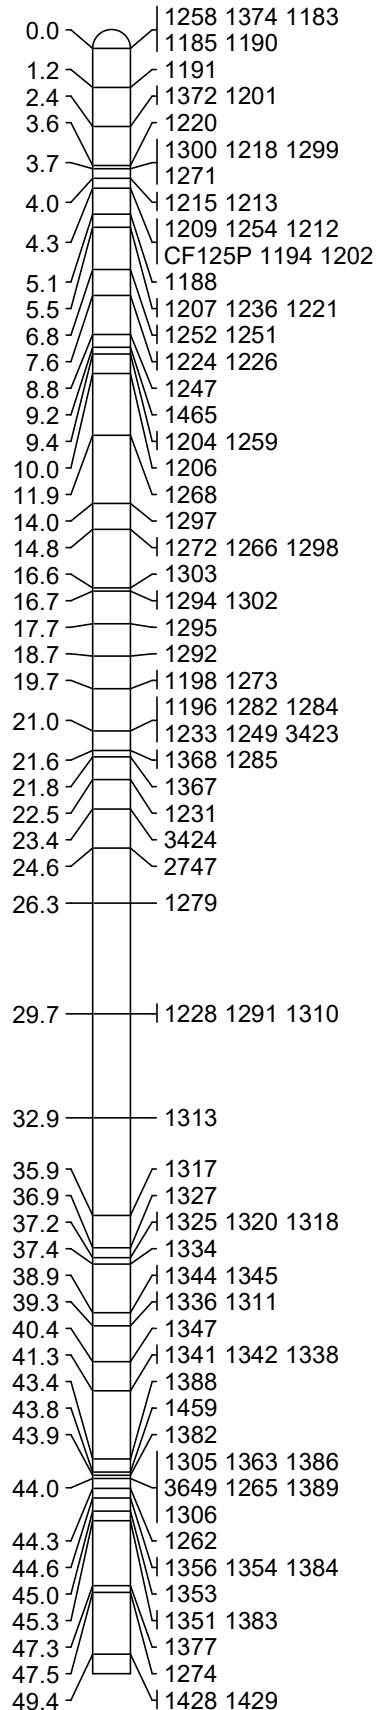

5 [2]

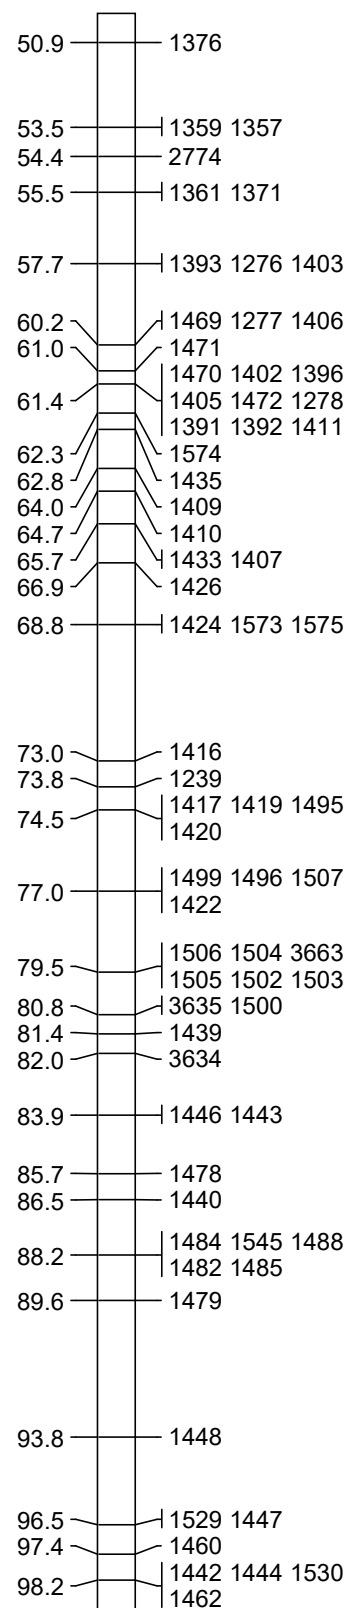

# P25 x P35 Full Linkage Map - 5

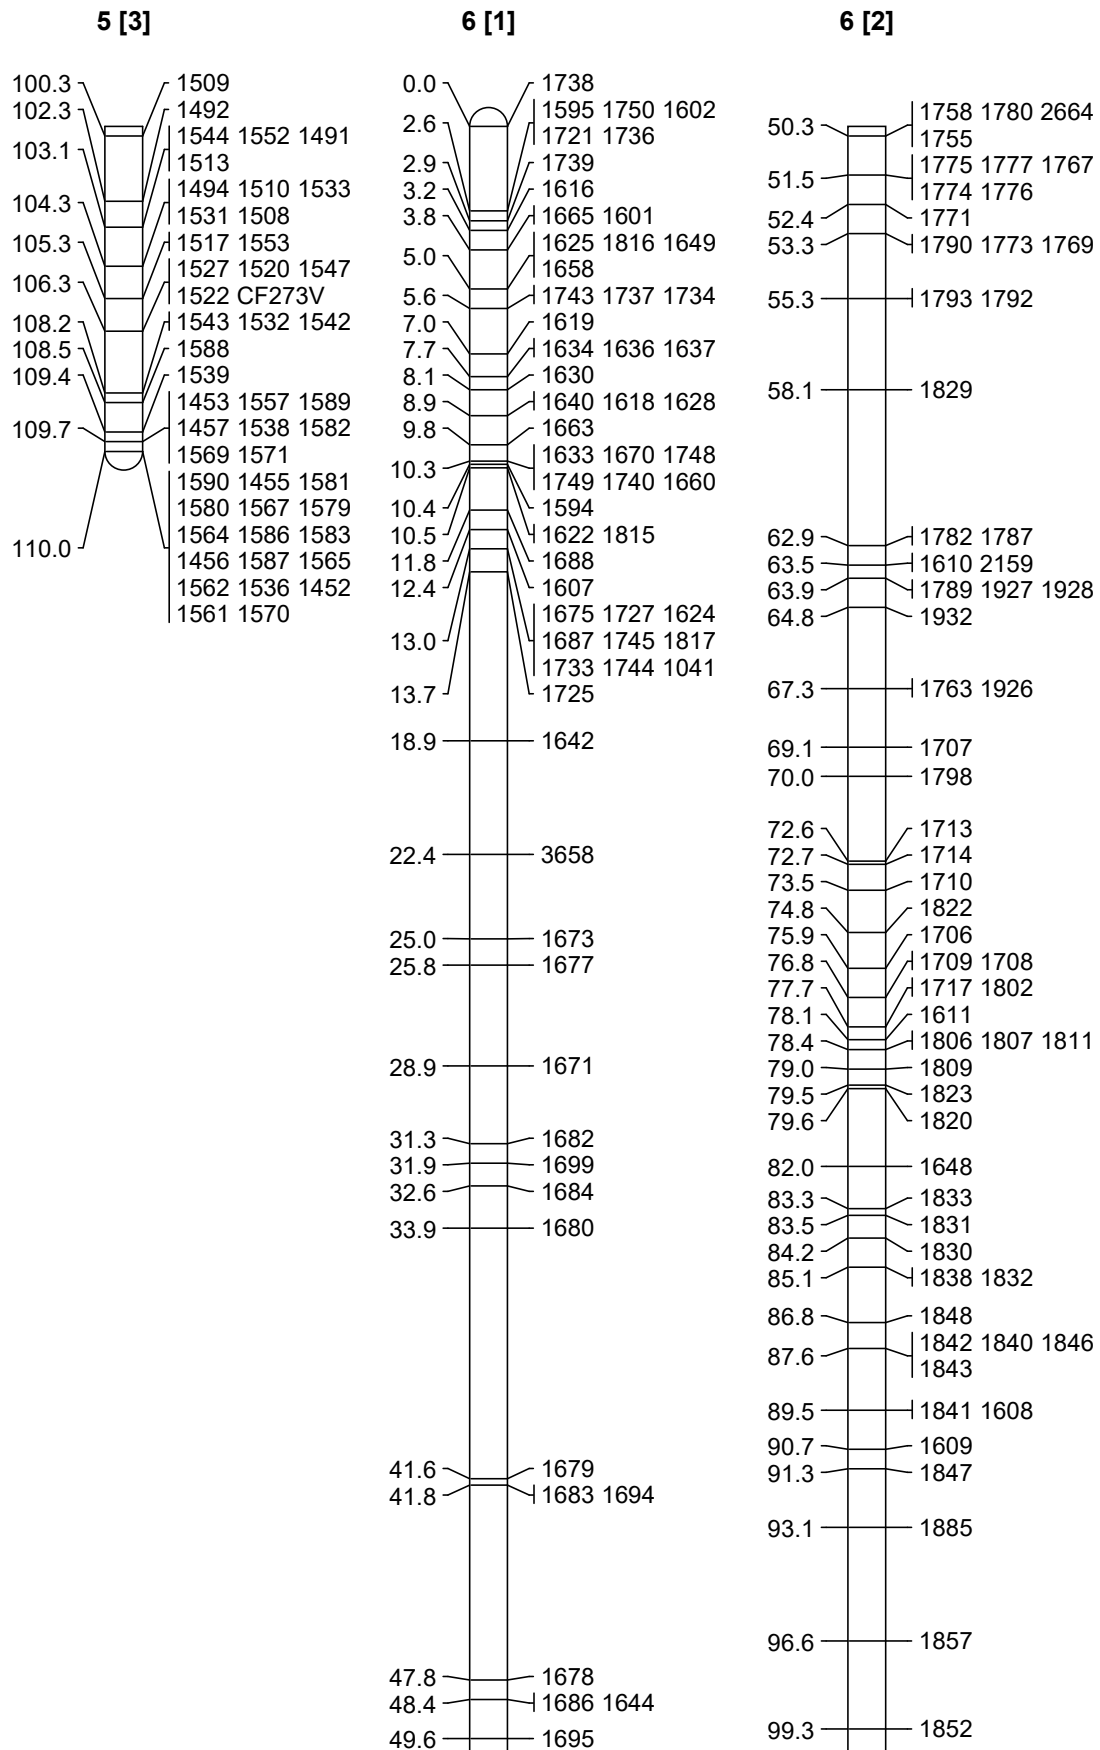

# P25 x P35 Full Linkage Map - 6

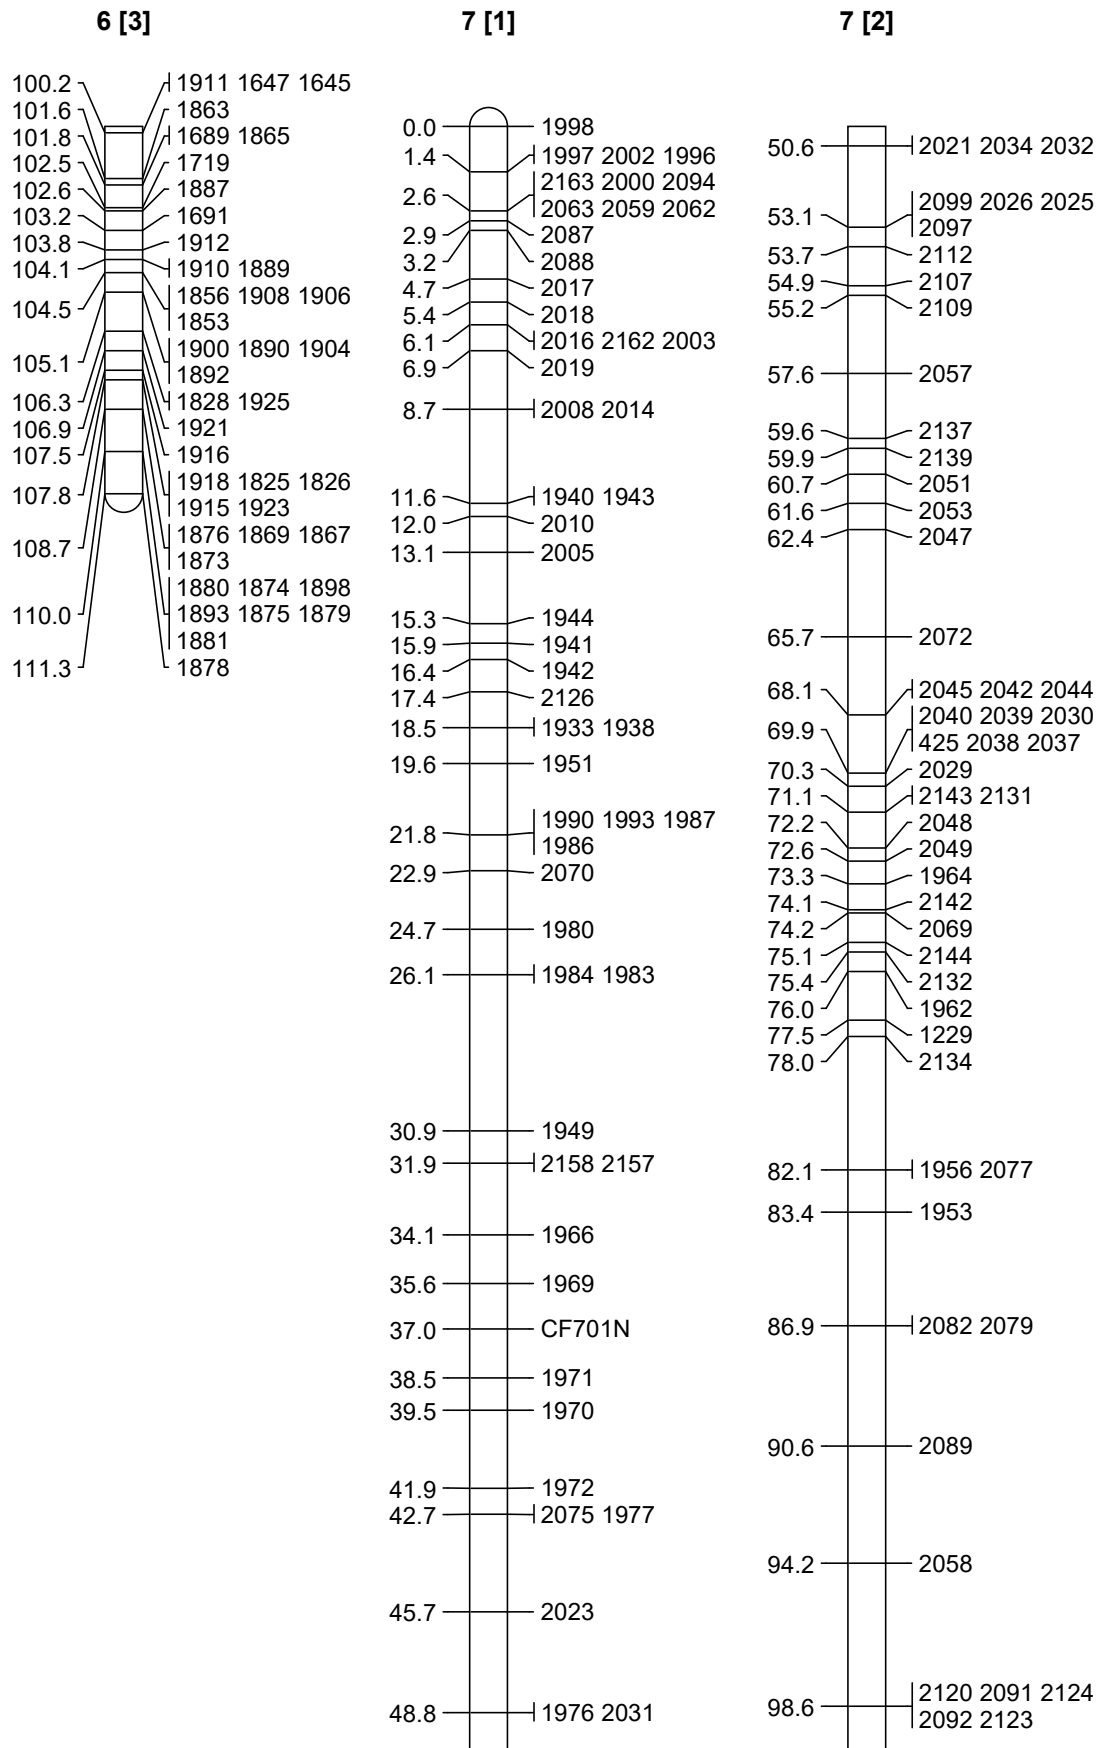

# P25 x P35 Full Linkage Map - 7

7 [3]

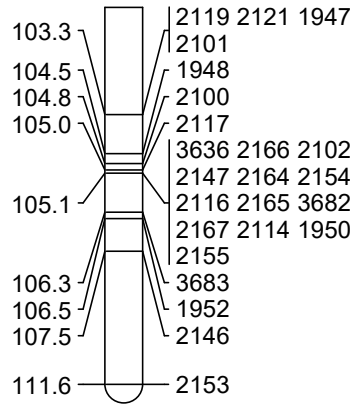

8 [1]

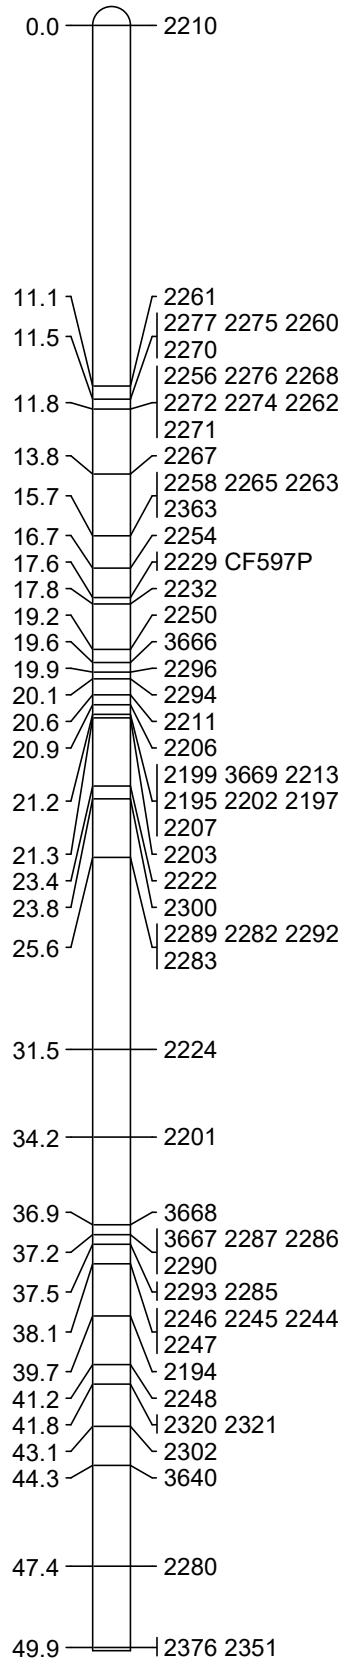

8 [2]

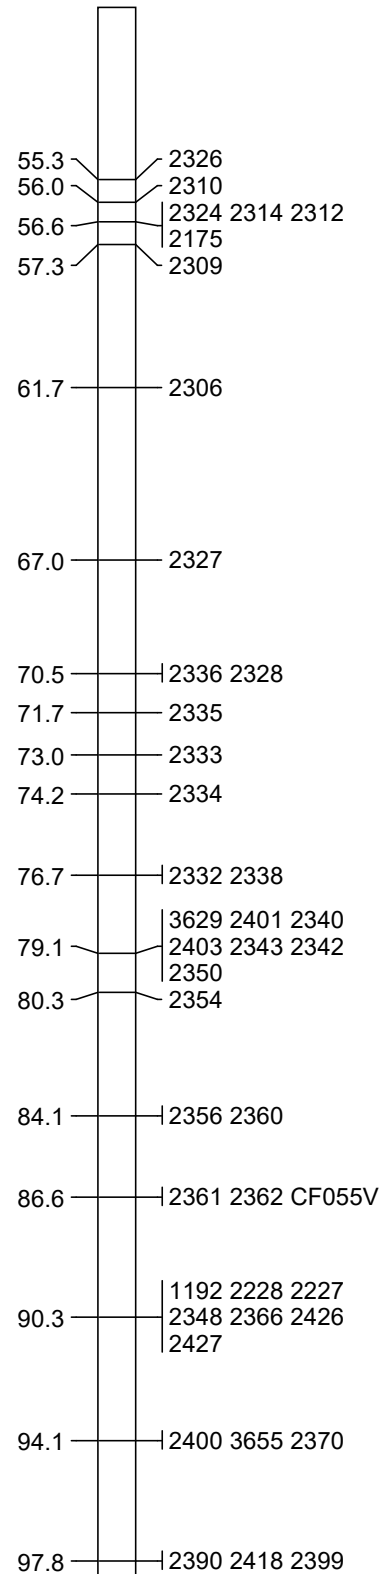

# P25 x P35 Full Linkage Map - 8

8 [3]

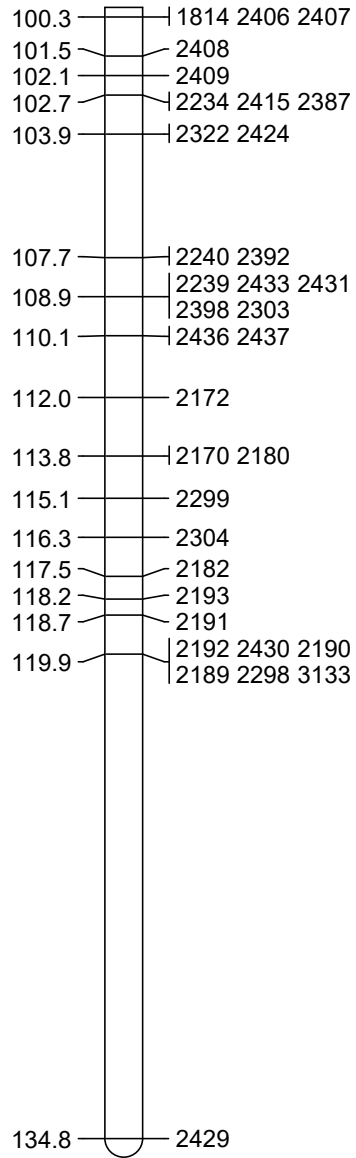

9 [1]

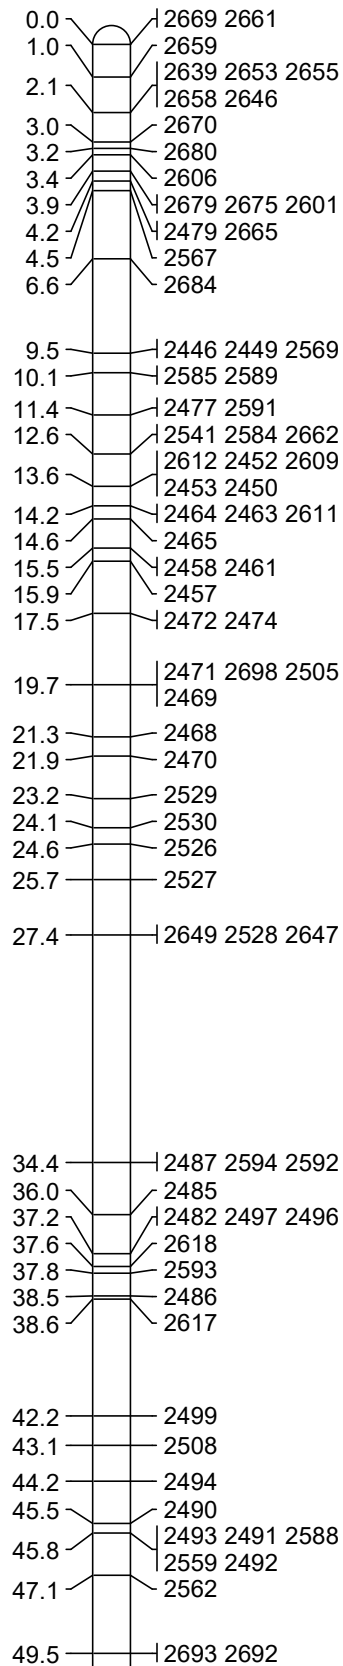

9 [2]

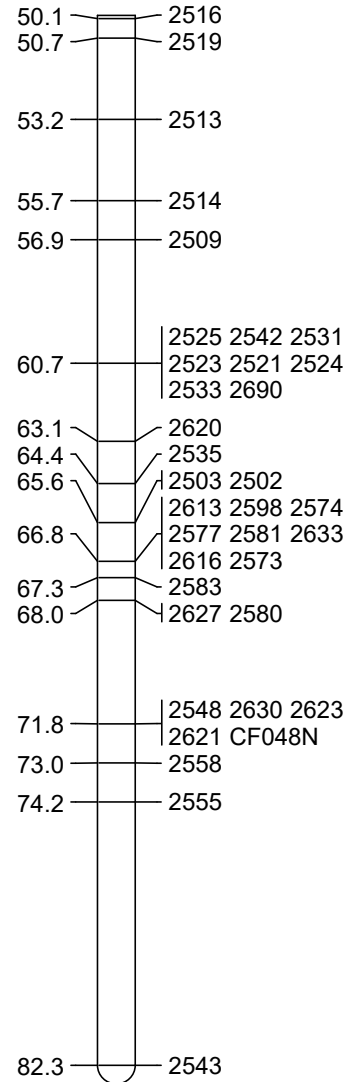



# P25 x P35 Full Linkage Map - 9

10 [1]

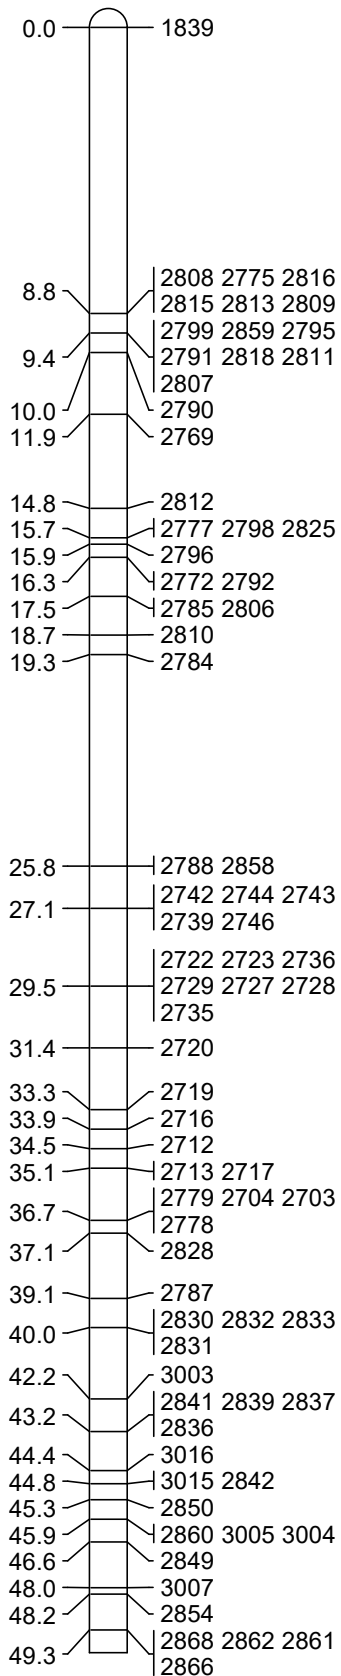

10 [2]

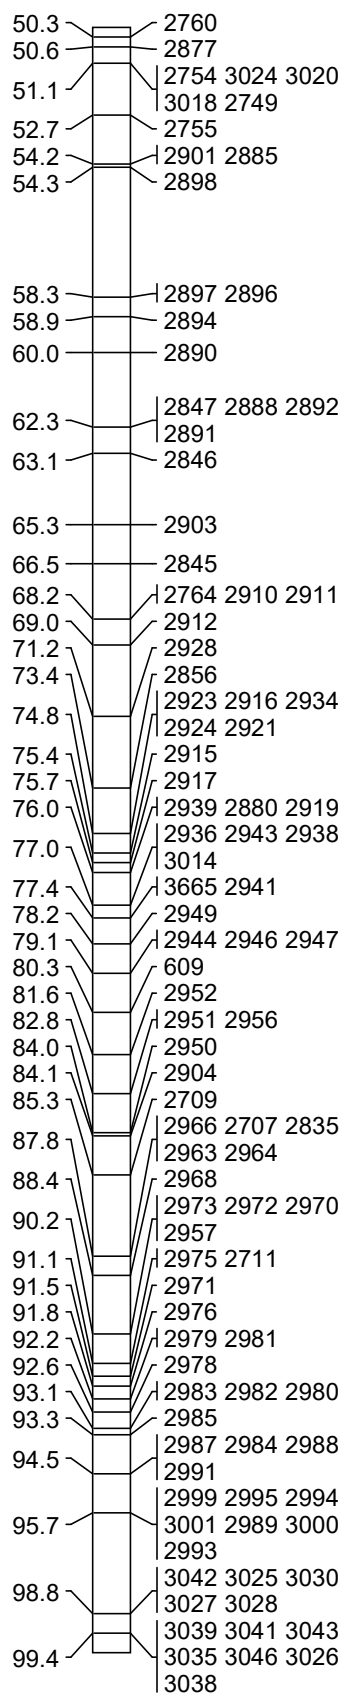

10 [3]

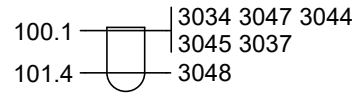

# P25 x P35 Full Linkage Map - 10

11 [1]

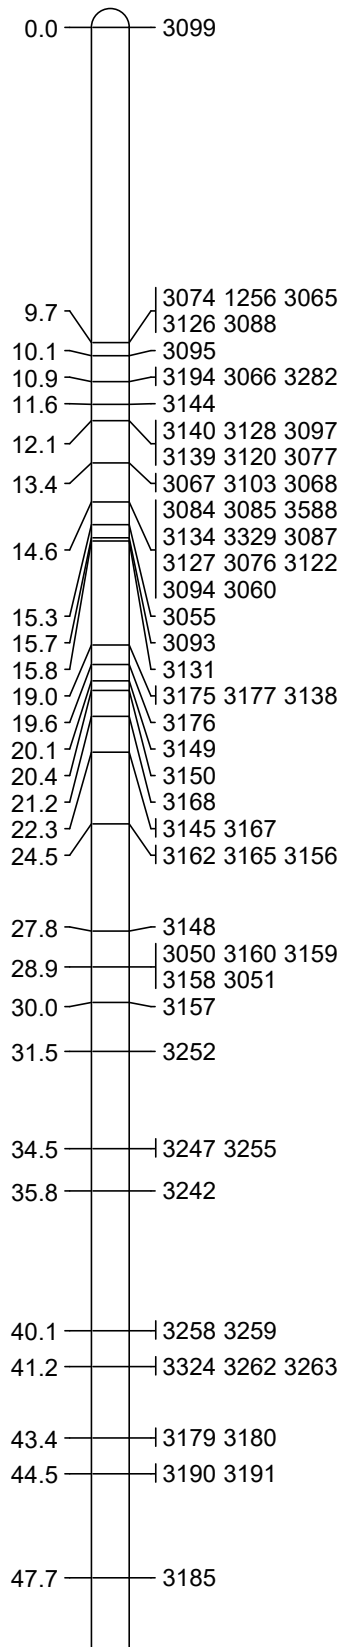

11 [2]

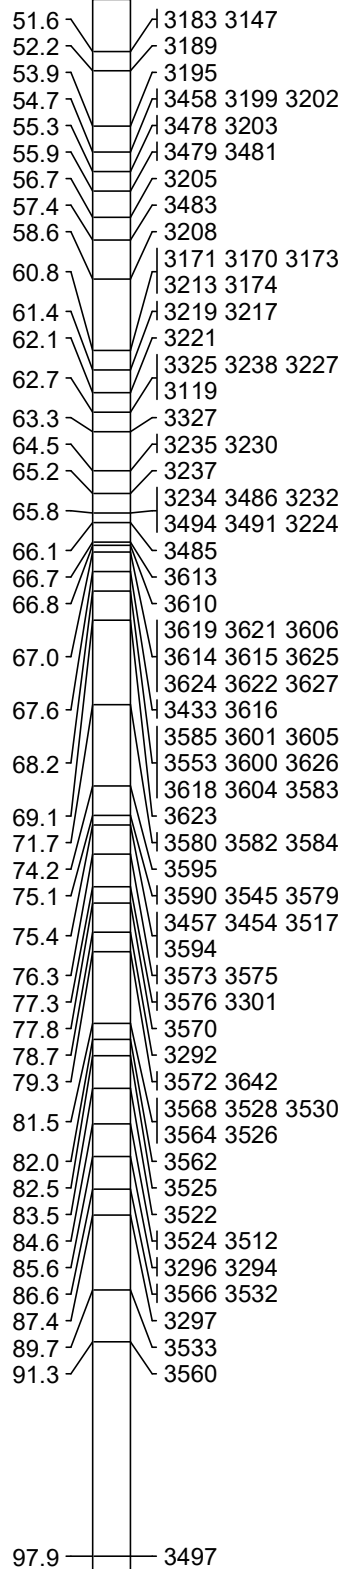

11 [3]

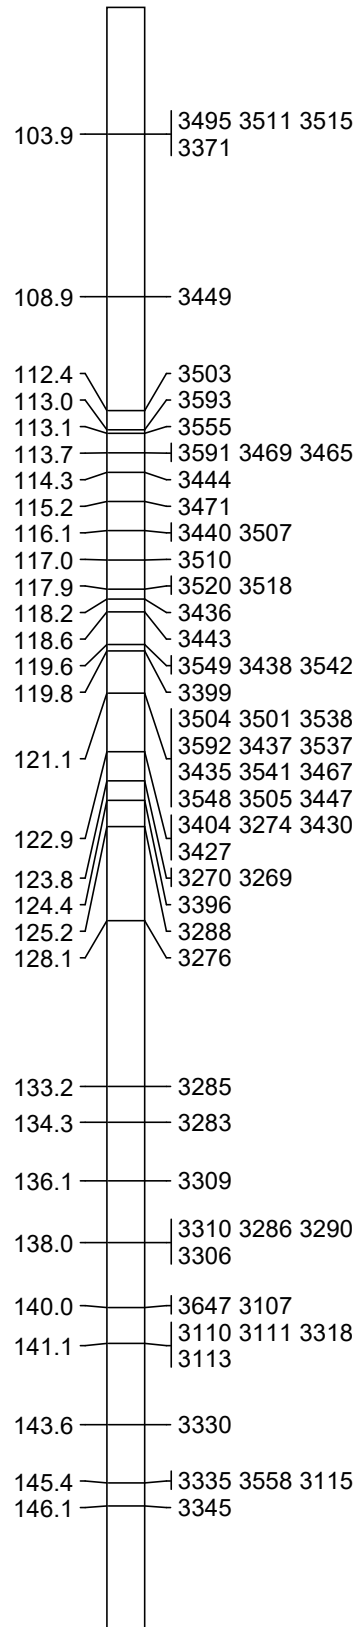

P25 x P35 Full Linkage Map - 11

11 [4]

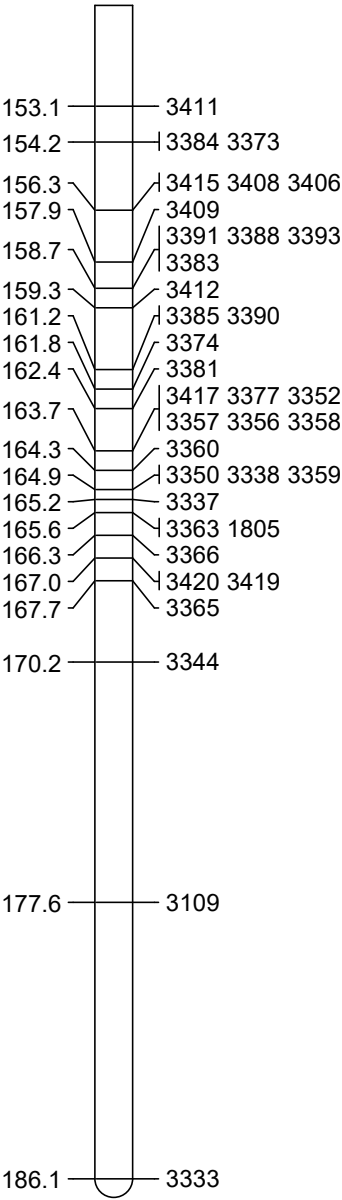

Supplement: s1 [file s1]
