# Supplementary material
Source: MDPI journal article supplement (https://www.mdpi.com/2311-7524/8/5/405)

# P25xP28 Full Linkage Map - 1

1 [1]

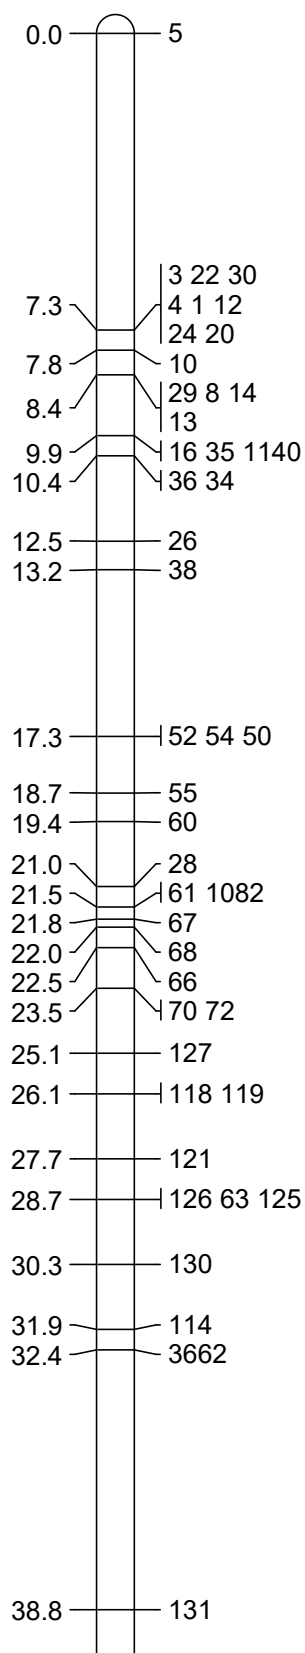

1 [2]

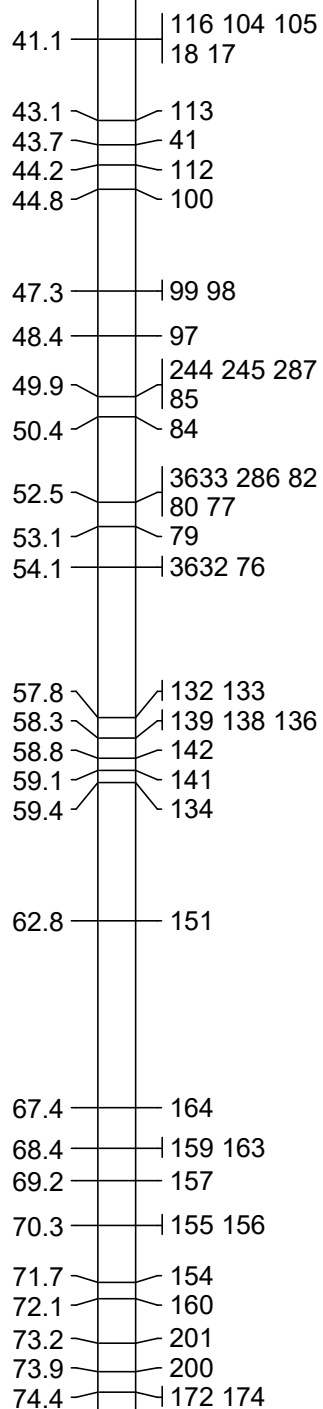

1 [3]

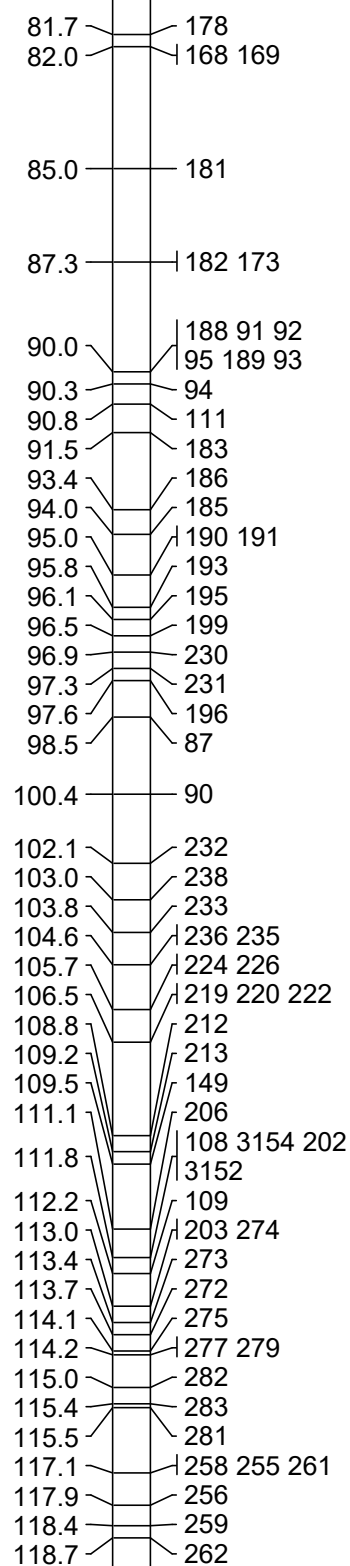

# P25xP28 Full Linkage Map - 2

1 [4]

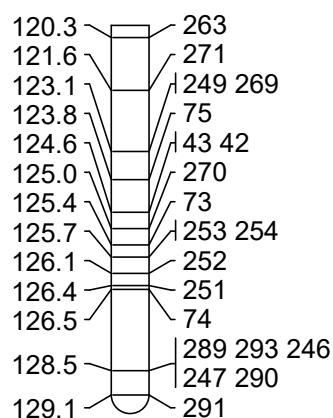

2 [1]

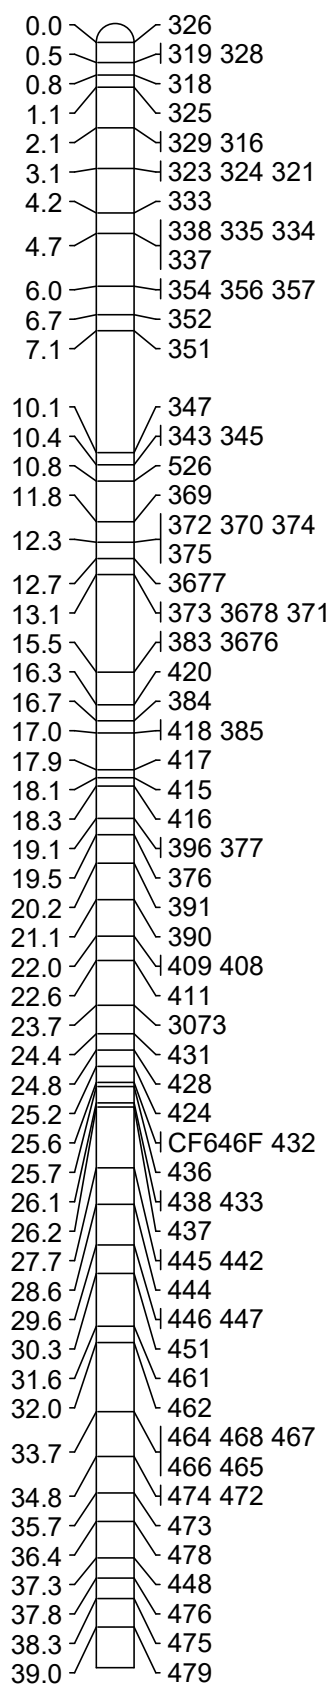

2 [2]

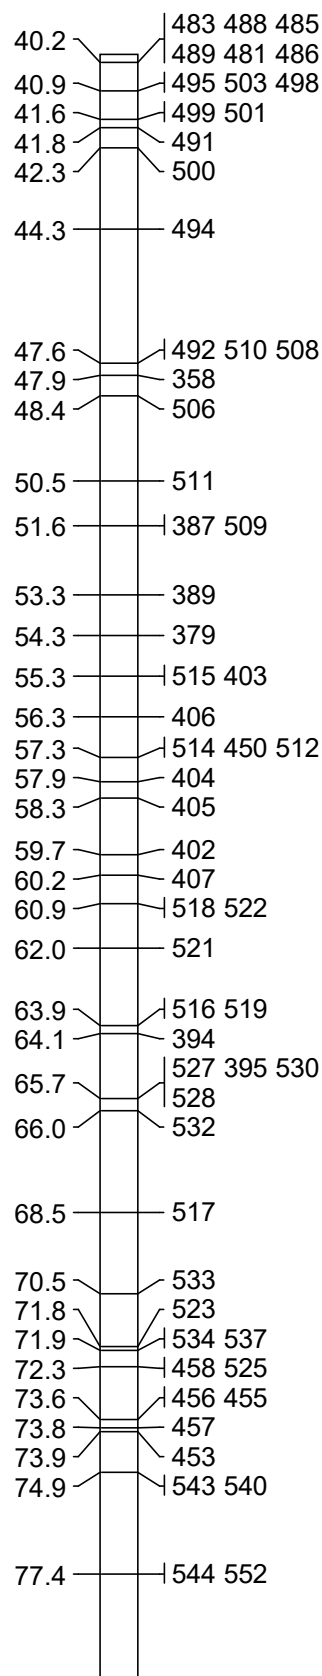

# P25xP28 Full Linkage Map - 3

2 [3]

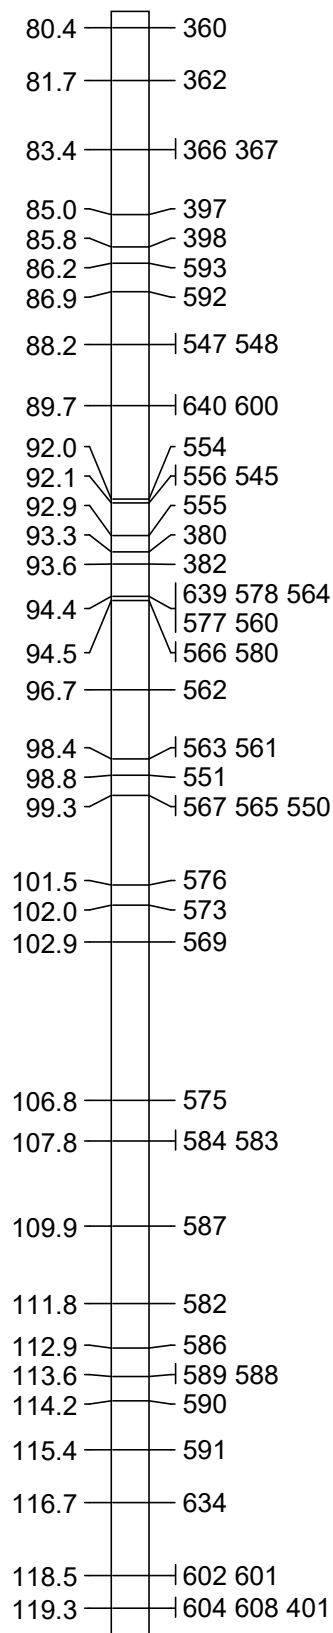

2 [4]

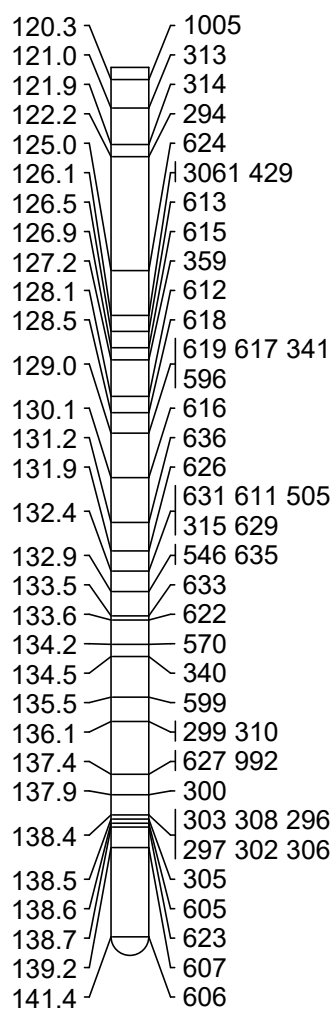

3 [1]

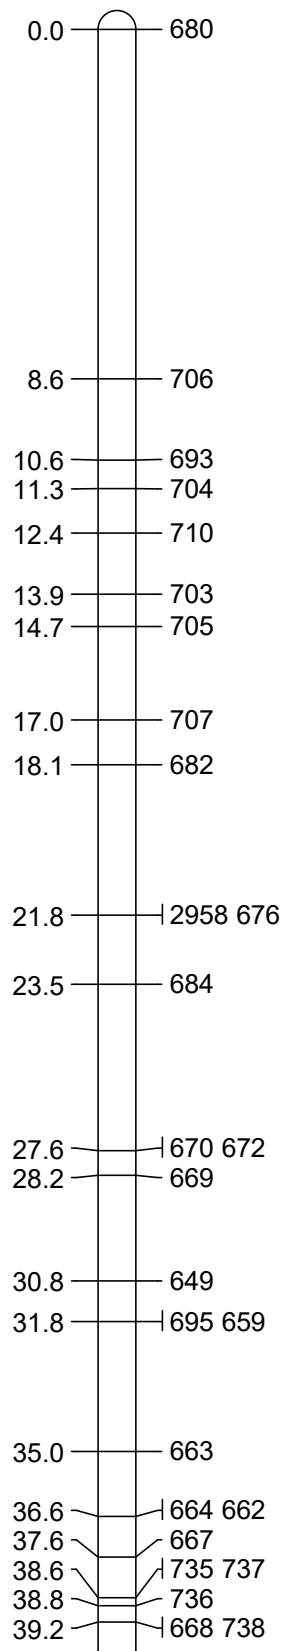

# P25xP28 Full Linkage Map - 4

3 [2]

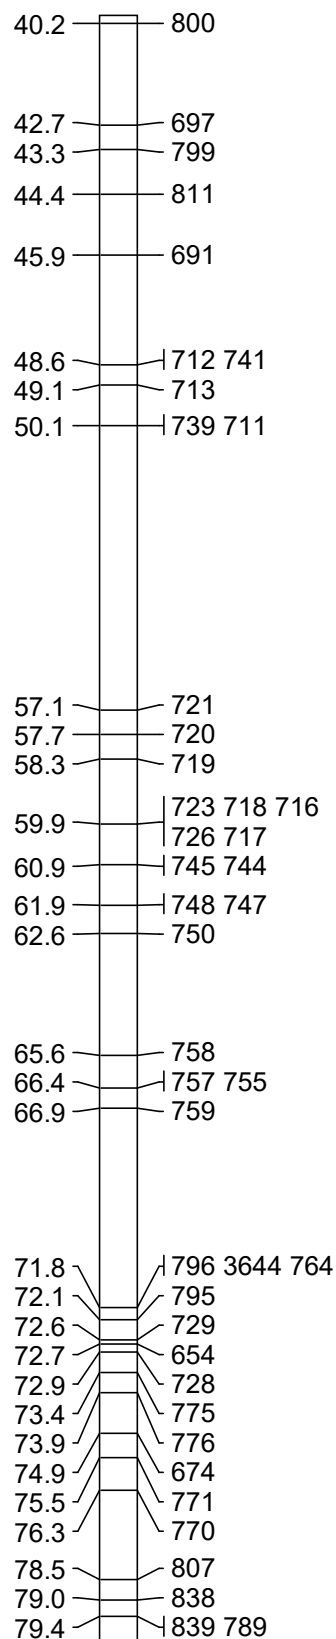

3 [3]

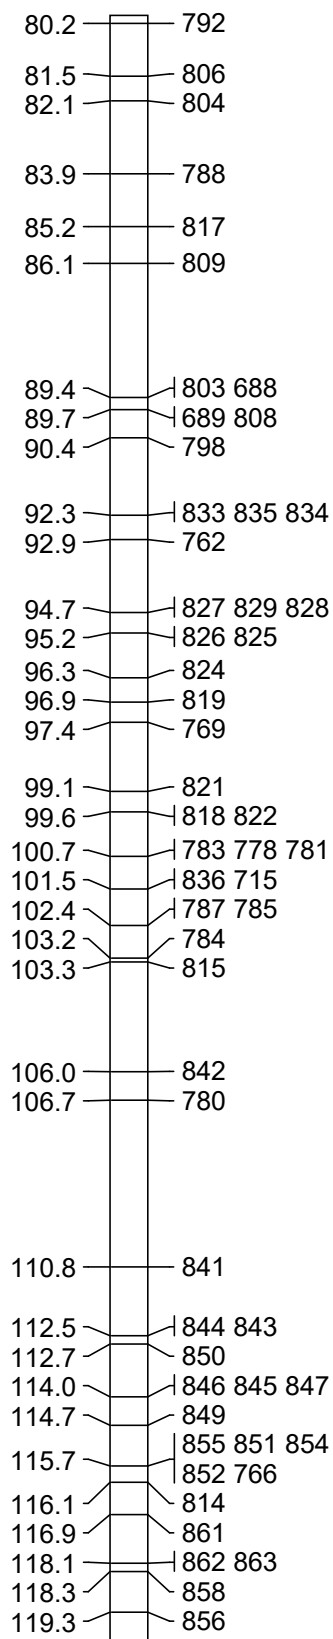

3 [4]

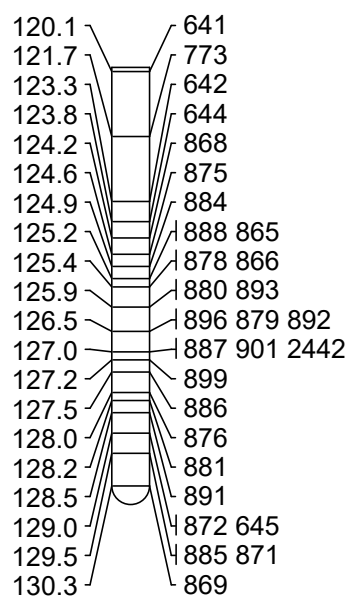

# P25xP28 Full Linkage Map - 5

4 [1]

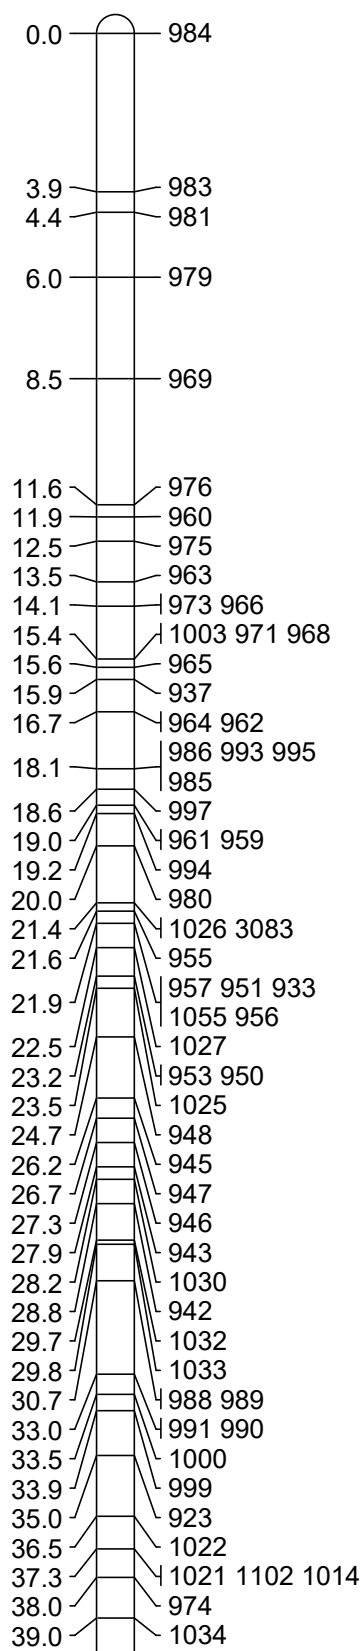

4 [2]

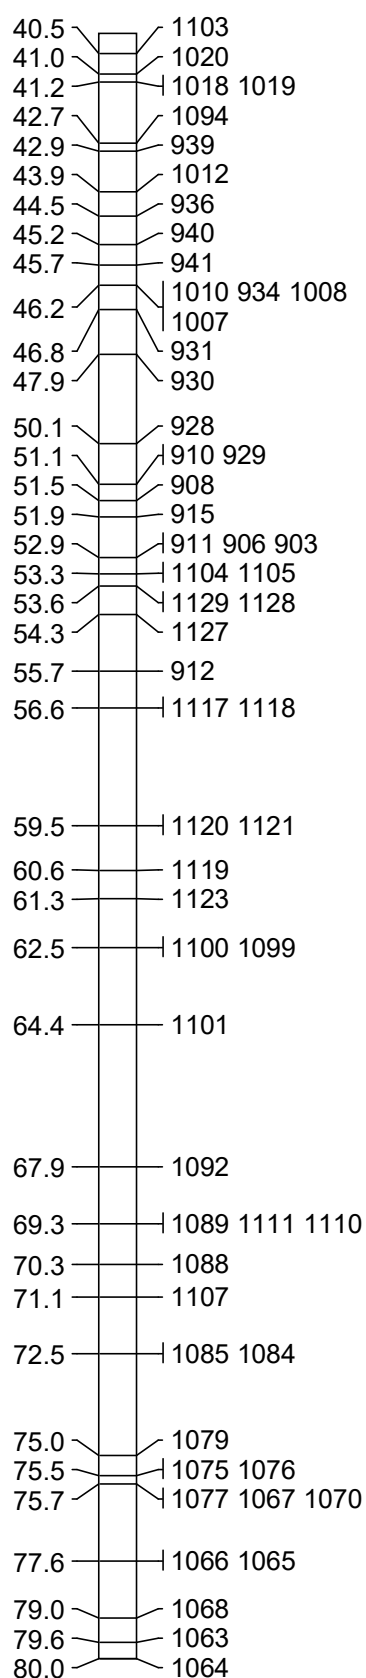

4 [3]

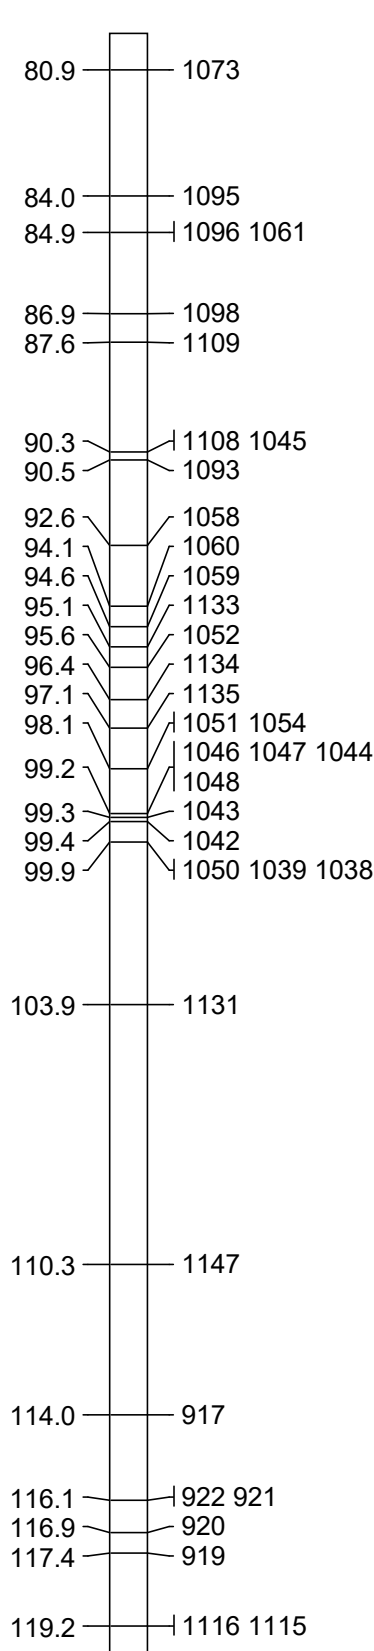

# P25xP28 Full Linkage Map - 6

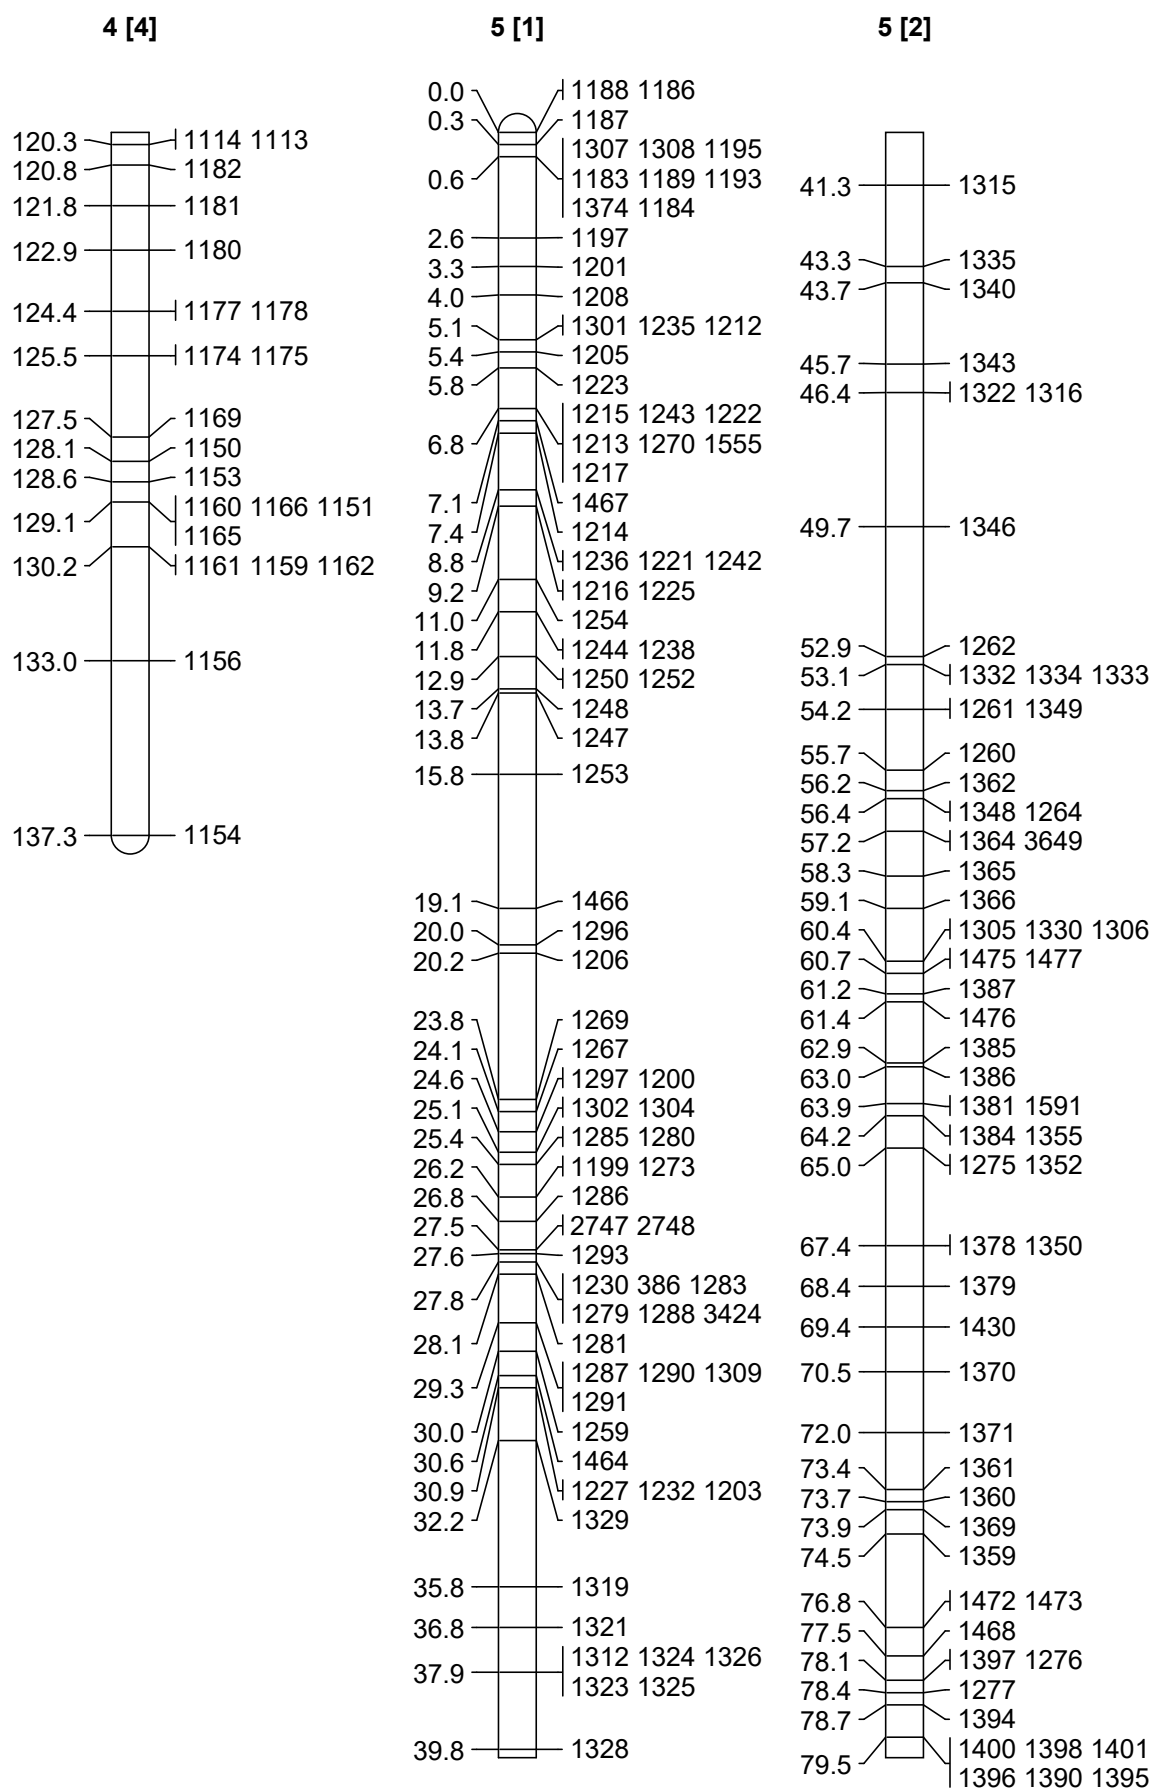

# P25xP28 Full Linkage Map - 7

5 [3]

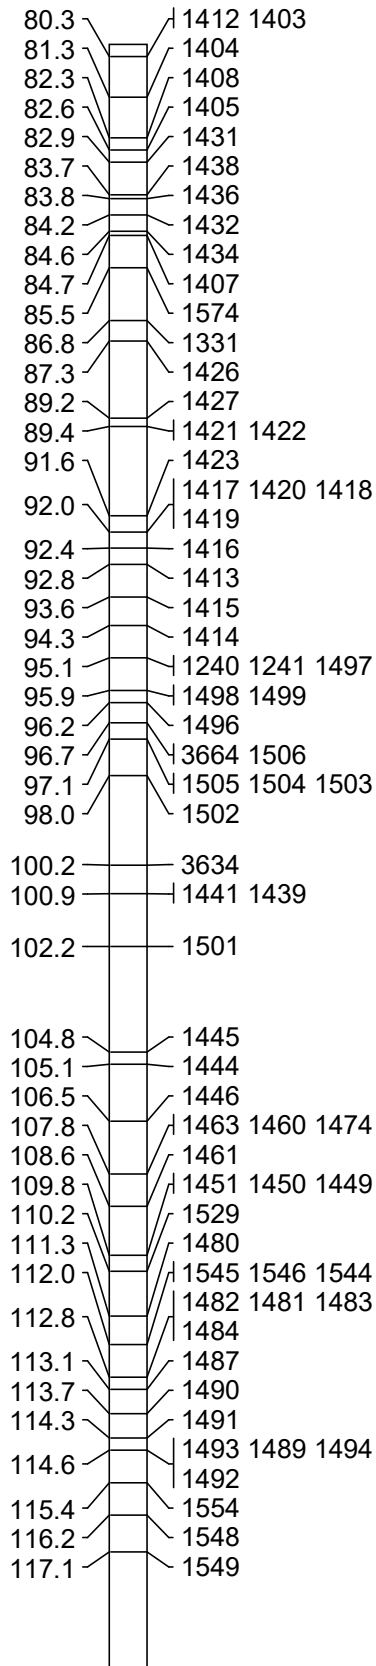

5 [4]

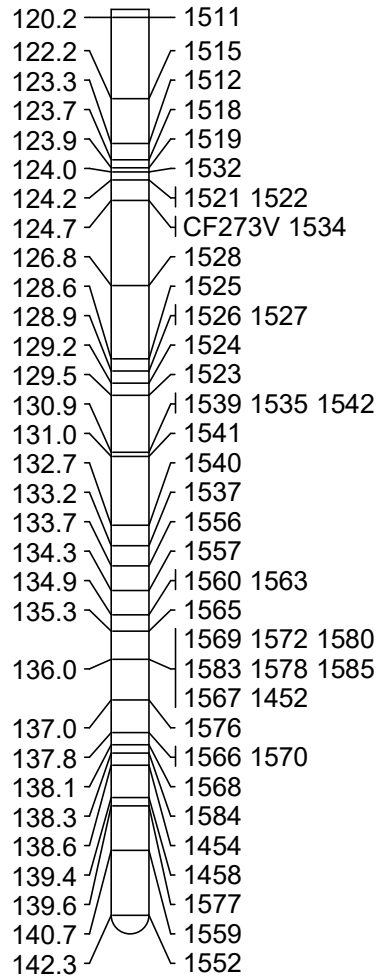

6 [1]

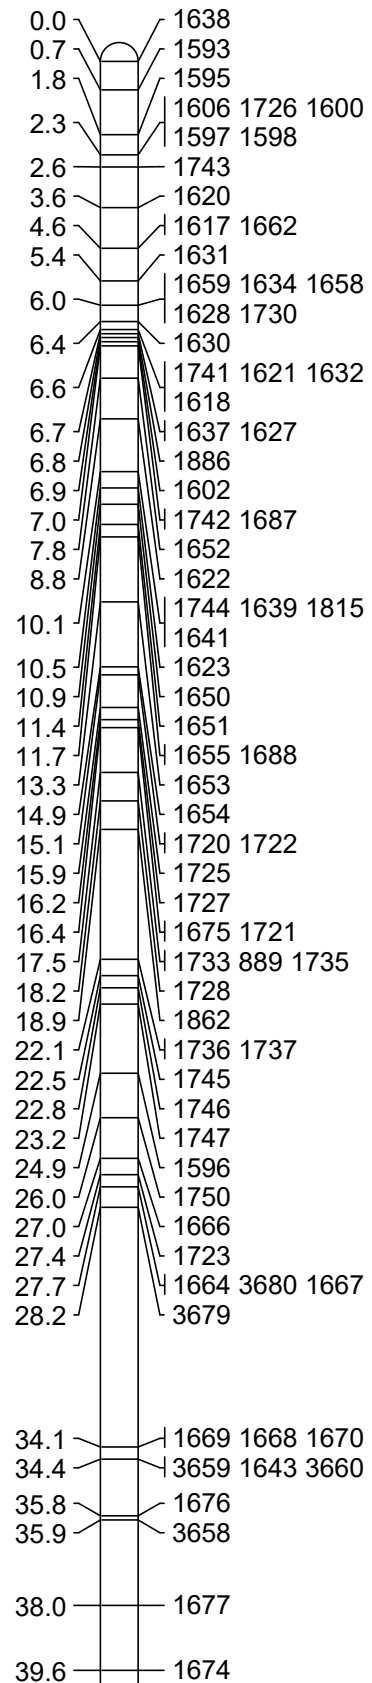

# P25xP28 Full Linkage Map - 8

6 [2]

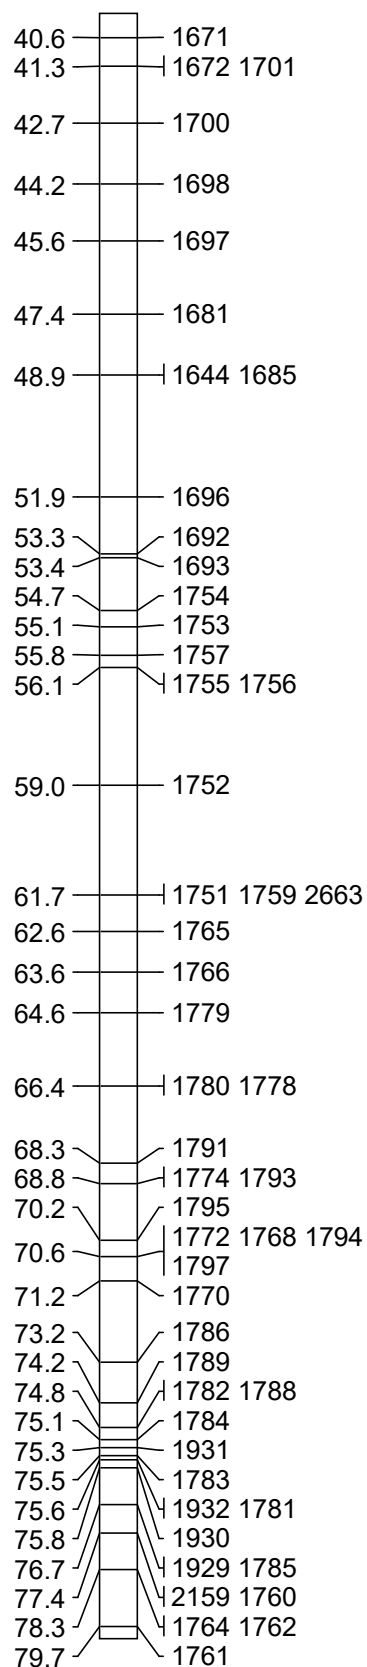

6 [3]

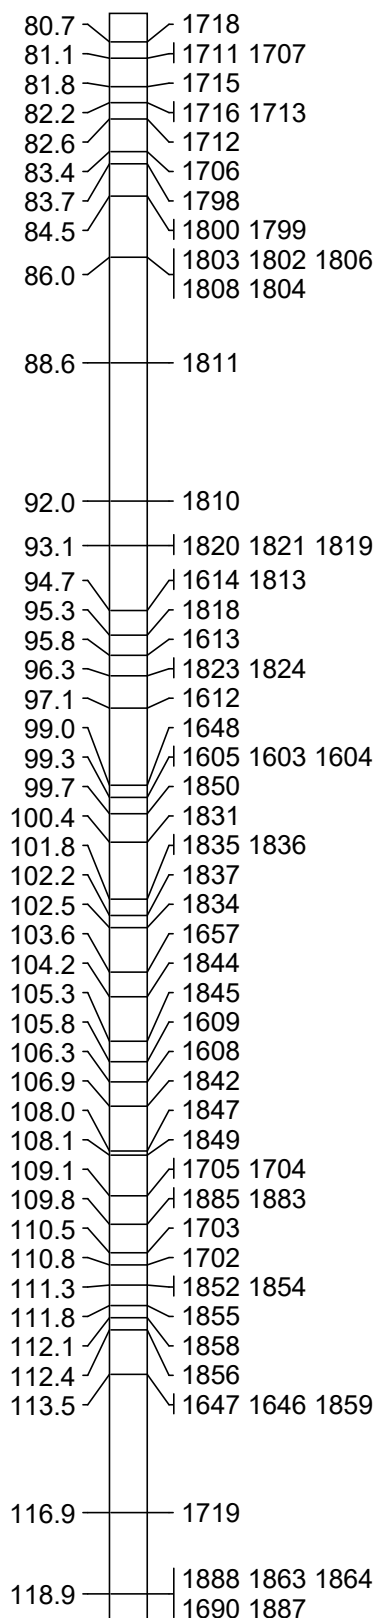

6 [4]

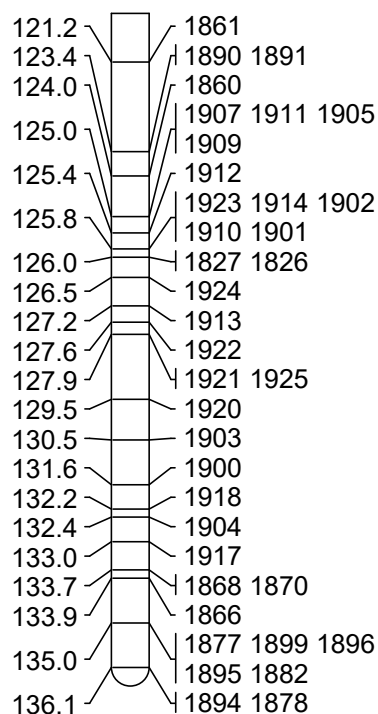



# P25xP28 Full Linkage Map - 9

7 [1]

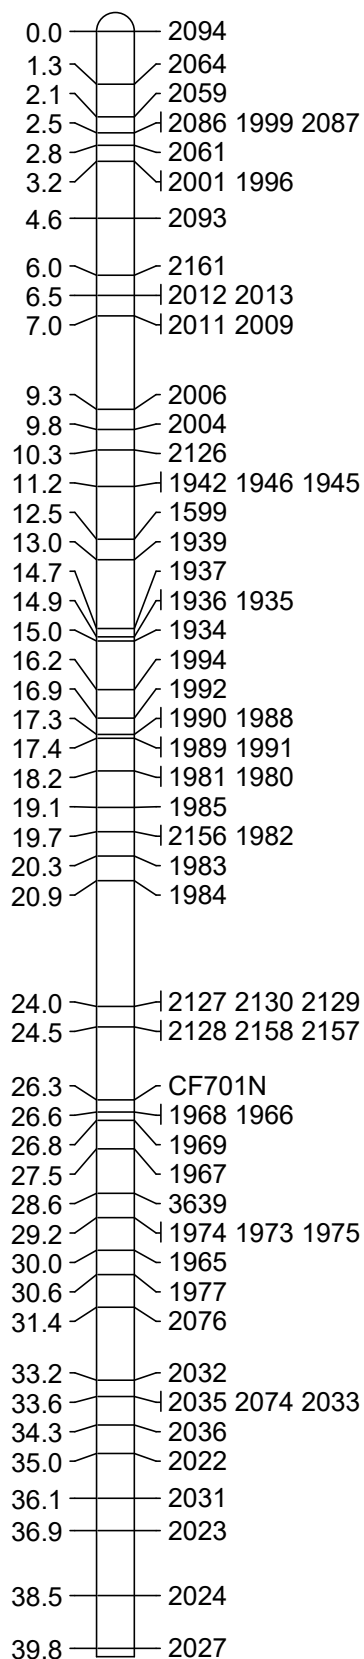

7 [2]

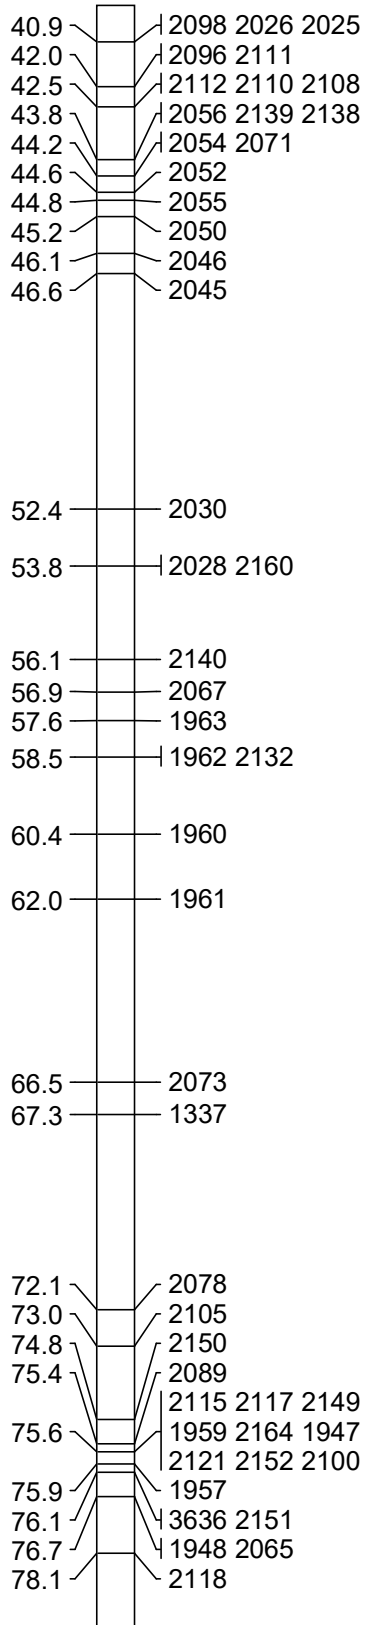

7 [3]

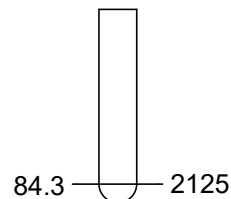

# P25xP28 Full Linkage Map - 10

8 [1]

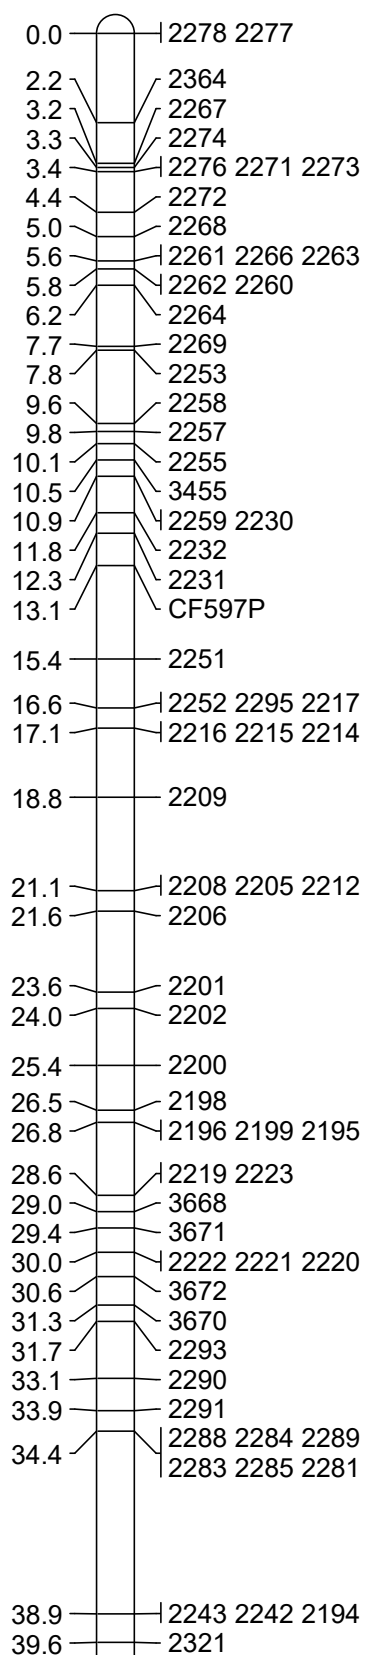

8 [2]

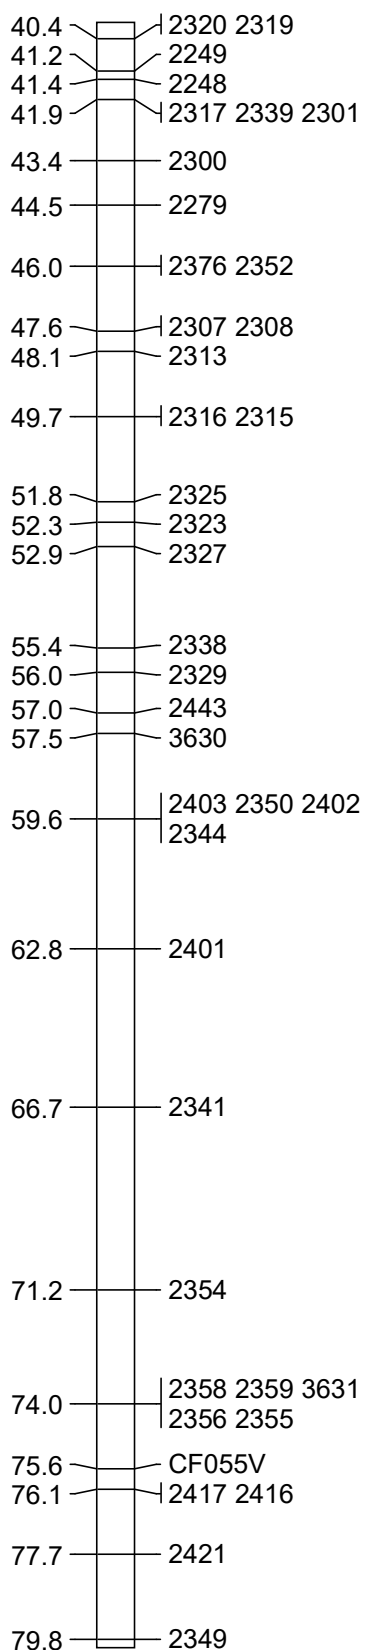

8 [3]

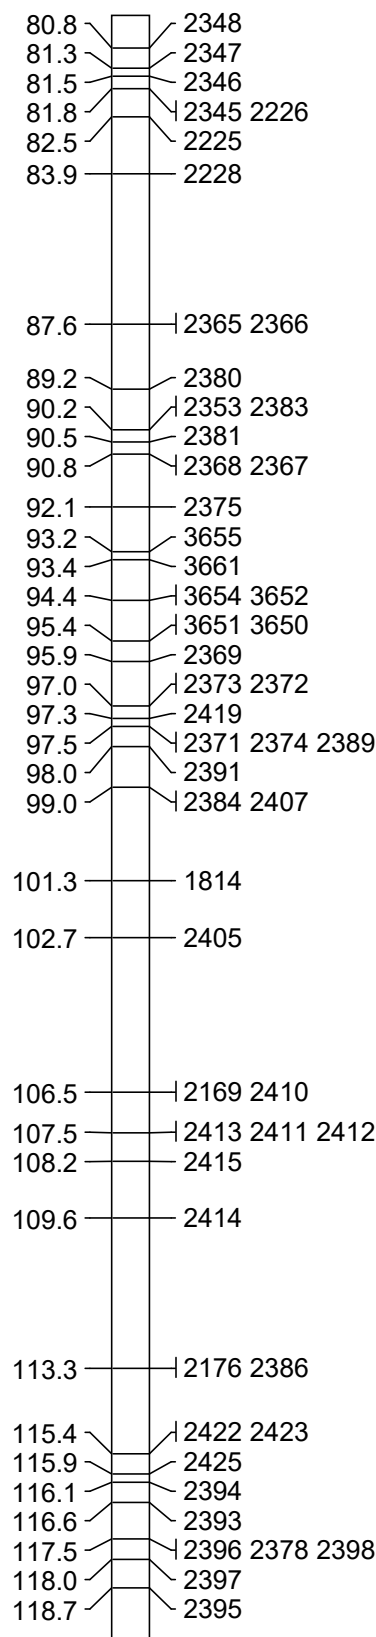

# P25xP28 Full Linkage Map - 11

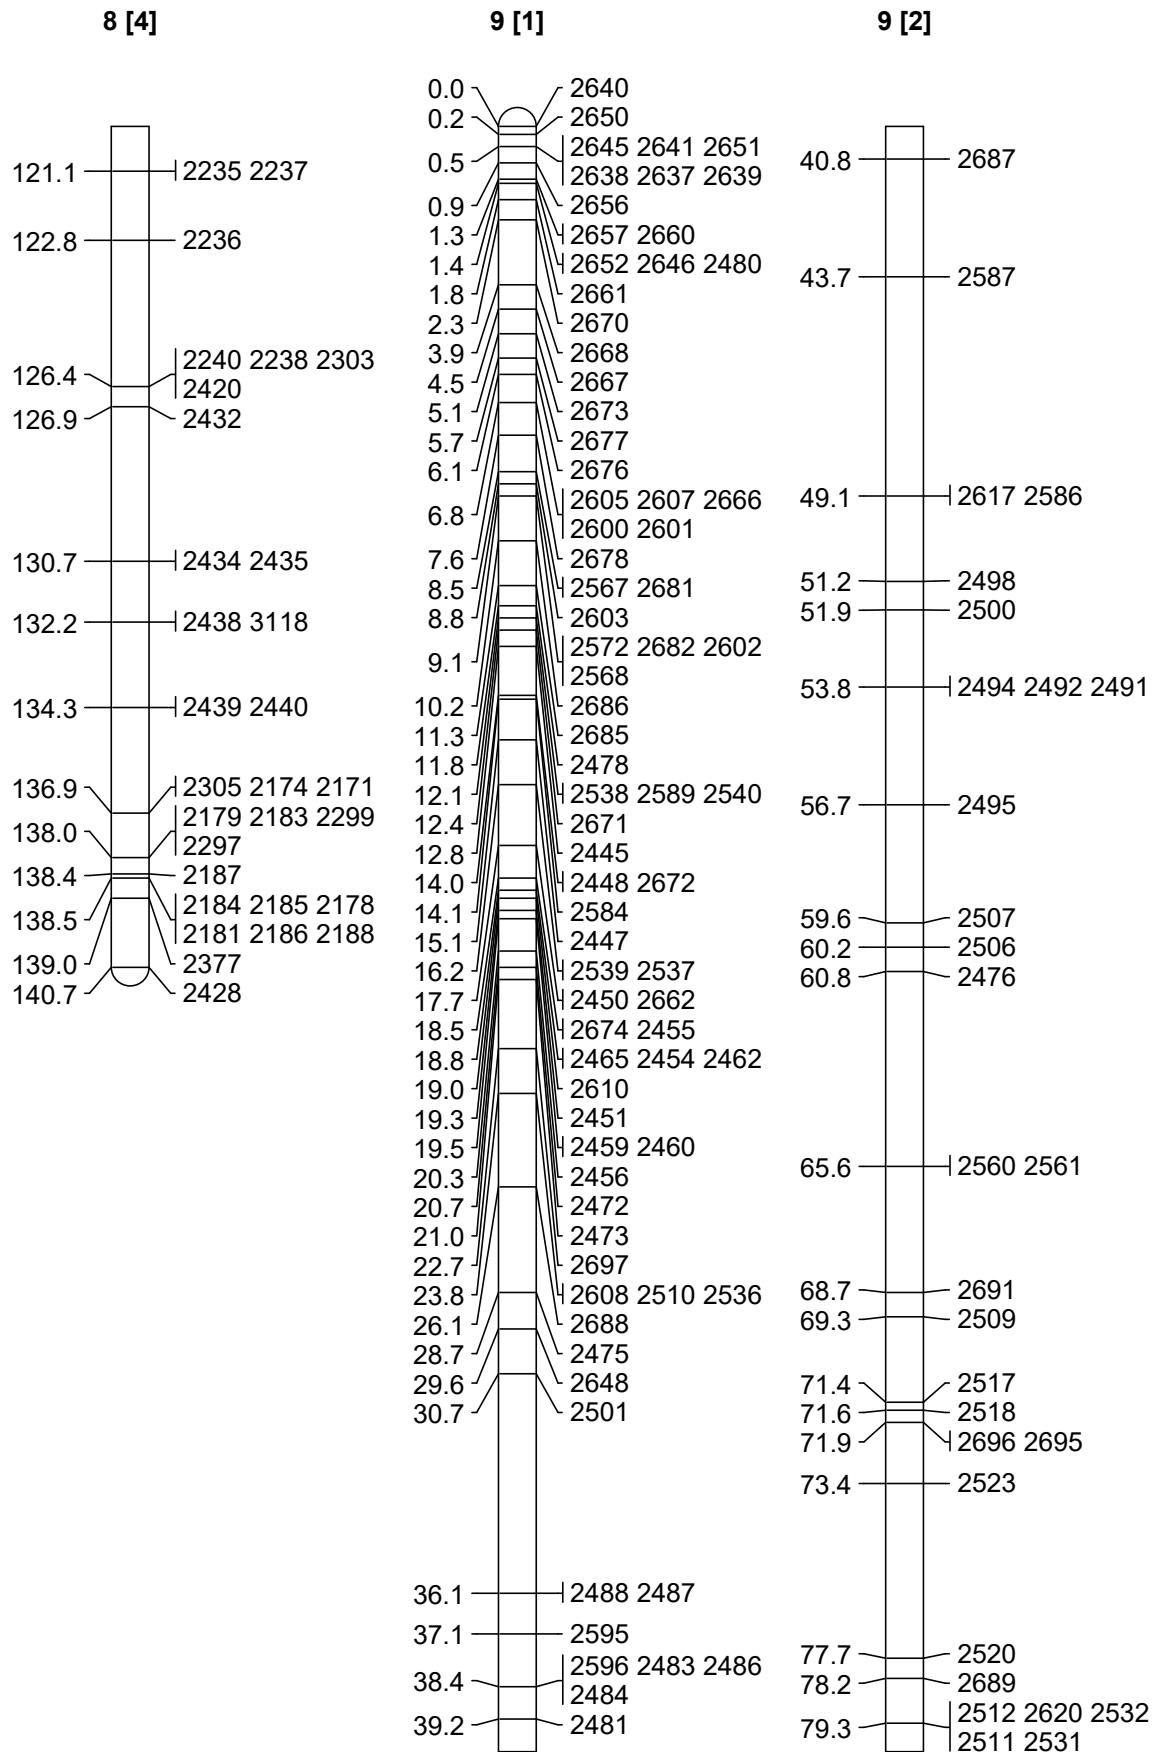

# P25xP28 Full Linkage Map - 12

9 [3]

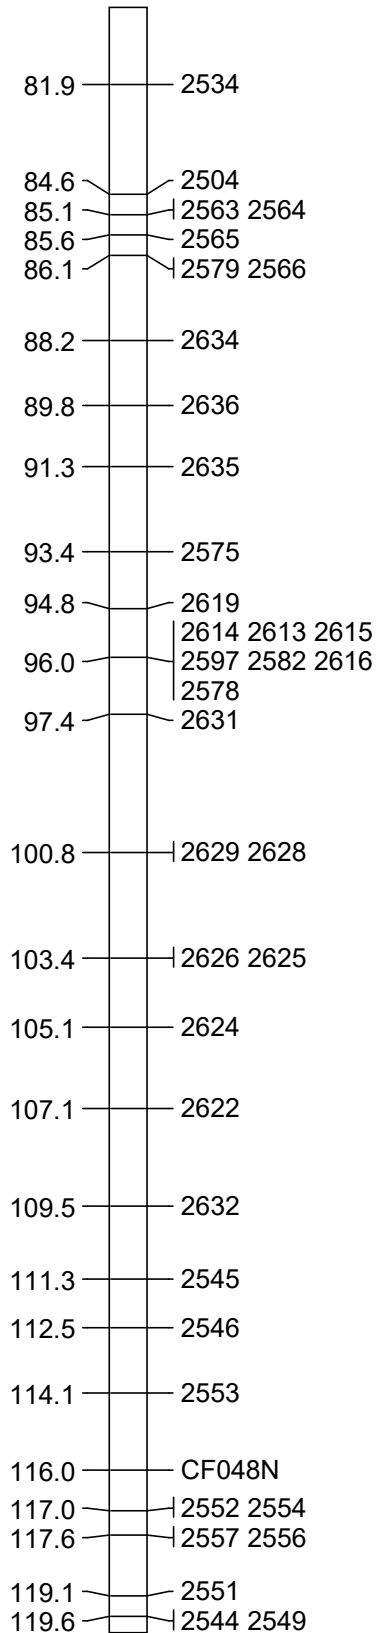

9 [4]

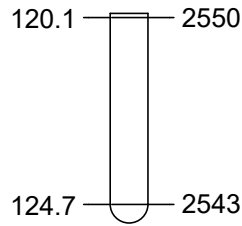

10 [1]

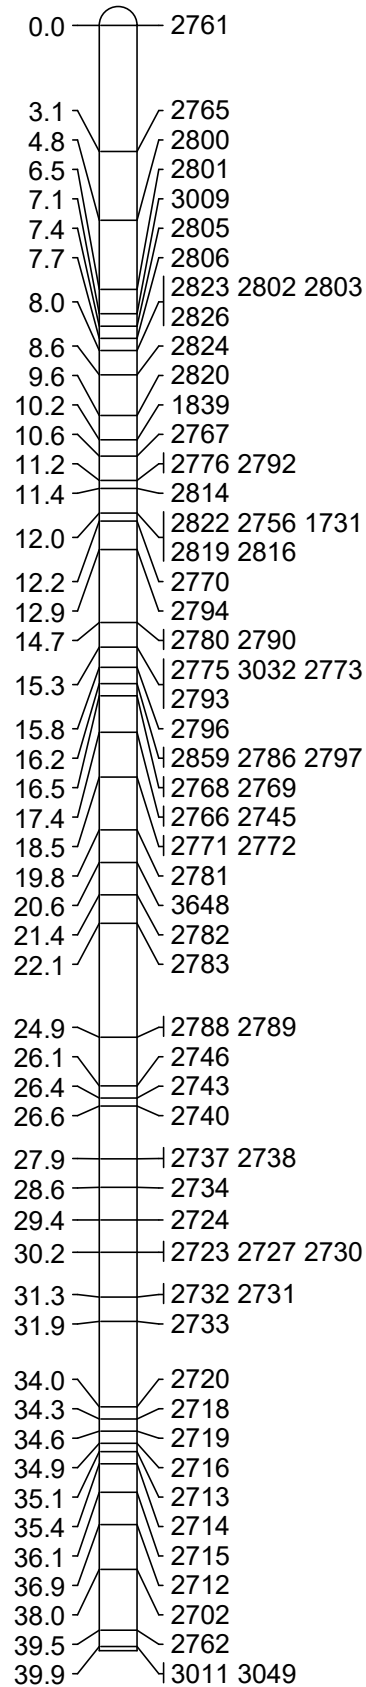

# P25xP28 Full Linkage Map - 13

10 [2]

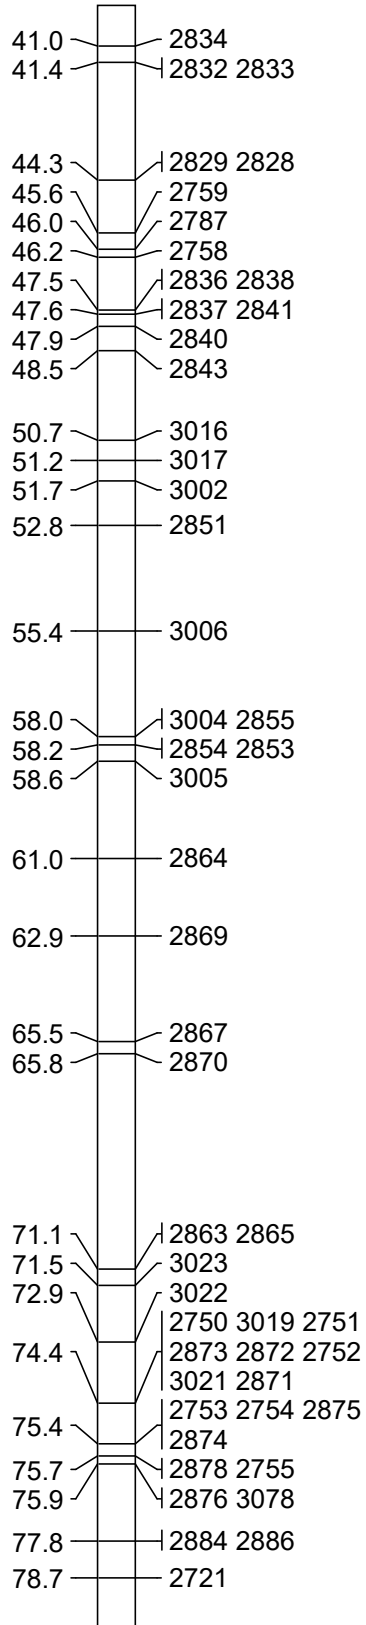

10 [3]

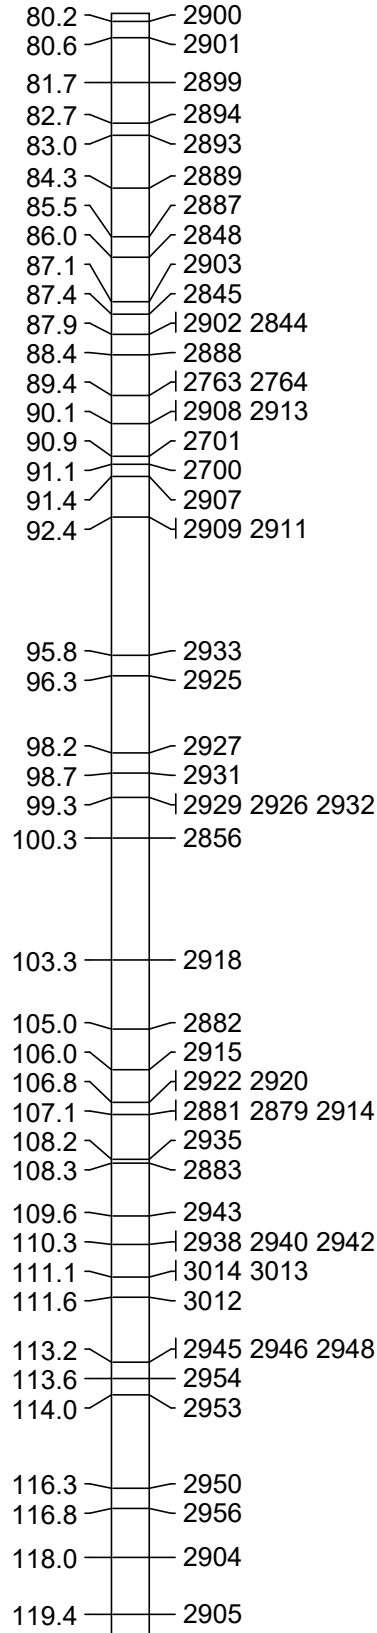

10 [4]

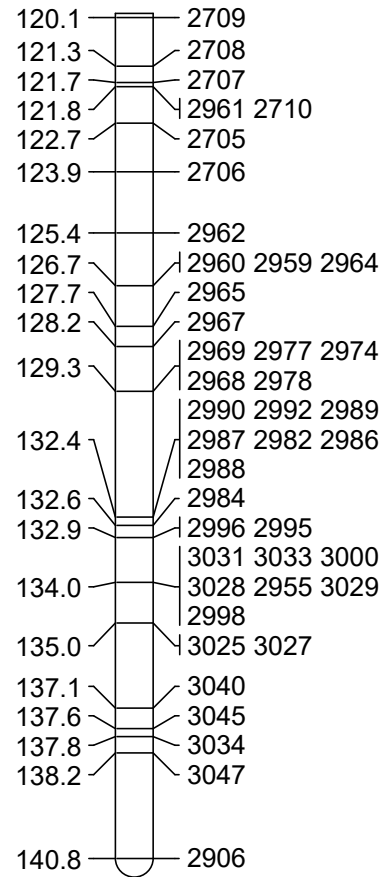

# P25xP28 Full Linkage Map - 14

11 [1]

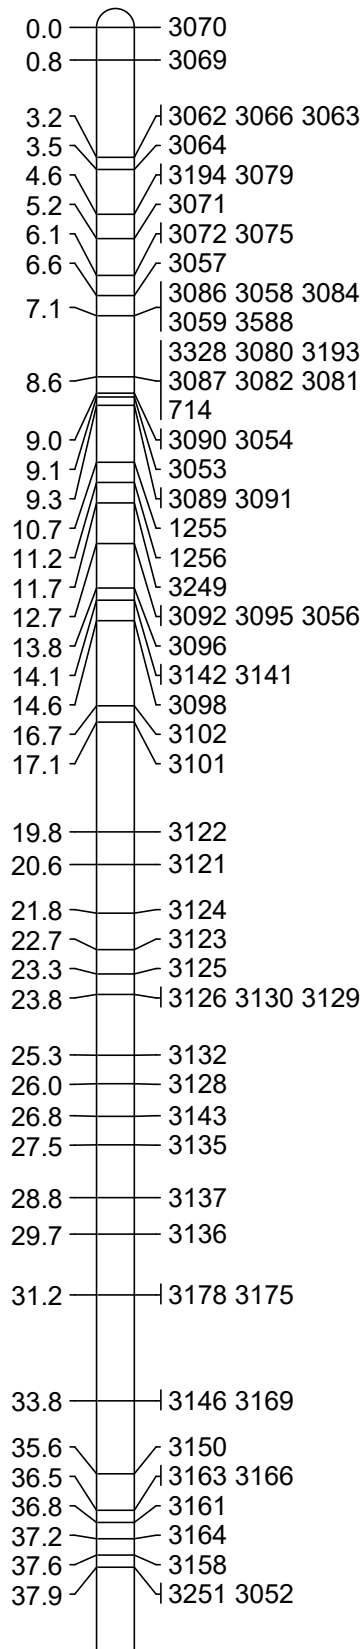

11 [2]

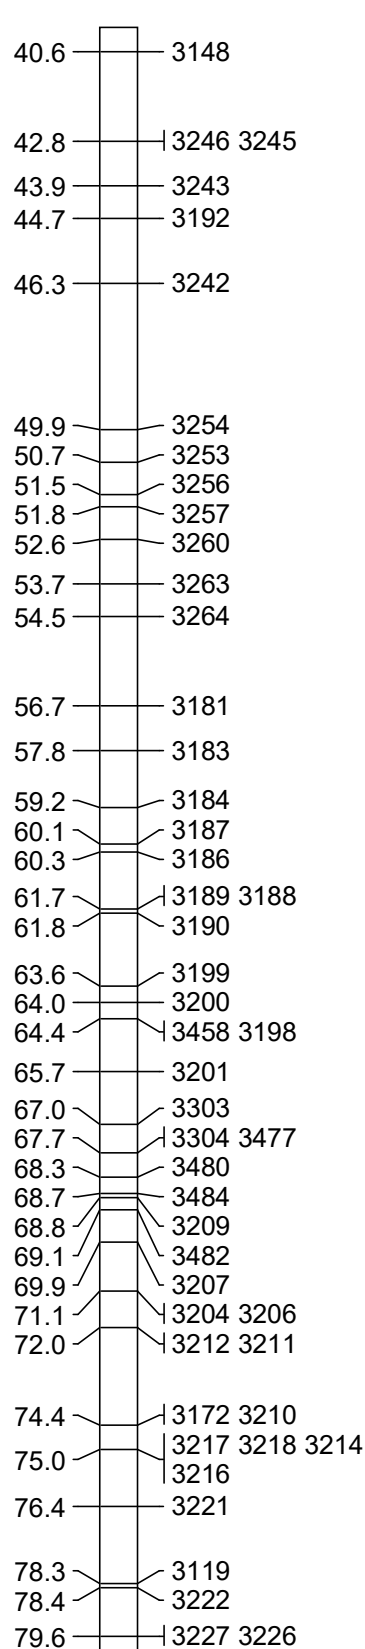

11 [3]

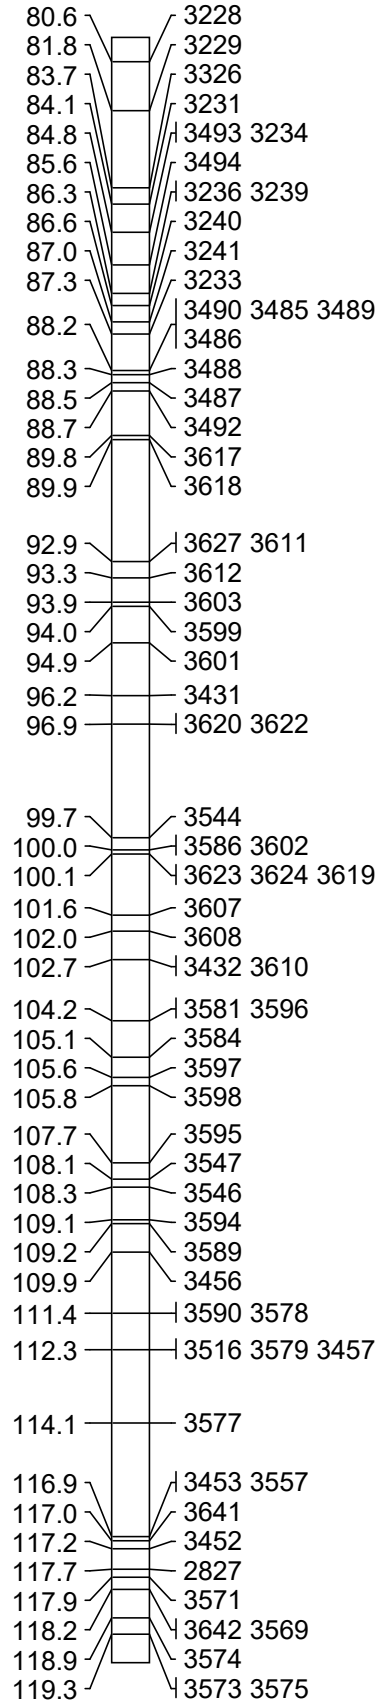

Supplement: s1 [file s1]
