# Supplementary material
Source: MDPI journal article supplement (https://www.mdpi.com/2311-7524/8/5/405)
Supplement: s1 [file s1]

**Table S1.** Marker conversion from Cross Pollinated (CP) notation to Backcross 1 (BC1) notation for each marker type  $\diamond$  and phase () for QTL analysis.

| Maternal meiosis               |             | Paternal meiosis               |             |
|--------------------------------|-------------|--------------------------------|-------------|
| $\langle lm \times ll \rangle$ |             | $\langle nn \times np \rangle$ |             |
| (0-)                           | (1-)        | (-0)                           | (-1)        |
| ll→a                           | ll→h        | nn→a                           | nn→h        |
| lm→h                           | lm→a        | np→h                           | np→a        |
| $\langle ab \times cd \rangle$ |             | $\langle ab \times cd \rangle$ |             |
| (0-)                           | (1-)        | (-0)                           | (-1)        |
| ac and ad→a                    | ac and ad→h | ac and bc→a                    | ac and bc→h |
| bc and bd→h                    | bc and bd→a | ad and bd→h                    | ad and bd→a |
| $\langle ef \times eg \rangle$ |             | $\langle ef \times eg \rangle$ |             |
| (0-)                           | (1-)        | (-0)                           | (-1)        |
| ee and eg→a                    | ee and eg→h | ee and ef→a                    | ee and ef→h |
| ef and fg→h                    | ef and fg→a | eg and fg→h                    | eg and fg→a |
| $\langle hk \times hk \rangle$ |             | $\langle hk \times hk \rangle$ |             |
| (0-)                           | (1-)        | (-0)                           | (-1)        |
| hh→a                           | hh→b        | hh→a                           | hh→b        |
| hk→ -                          | hk→ -       | hk→ -                          | hk→ -       |
| kk→b                           | kk→a        | kk→b                           | kk→a        |
